# Supplementary material for: Molecular Mechanism of Engineered Zymomonas Mobilis Response to Furfural and Acetic acid Stress
Source: Research Square preprint supplement (doi:10.21203/rs.3.rs-629707/v1), 2021-06-29
Supplement: Supplementary file 1 [file 1755b46d1716e9f3fd255d3a.xlsx]

## Sheet: AF_ZM4vsRM_ZM4.DEG
Table S8 Differentially Expressed Genes of wild type ZM4 in rich media and media with acetic + furfural treatments
Gene_id	readcount_AF_ZM4	readcount_RM_ZM4	log2FoldChange	pval	padj	gene_name	description
Novel00001	3292.08	1964.01	0.74519	0.00096495	0.0029461	-//-
Novel00002	2488.54	832.693	1.5794	0.0020943	0.0059221	-//-
Novel00003	1617.8	3382.43	-1.064	0.00067305	0.0021589	-//-
Novel00004	2044.43	123.667	4.0472	3.2705e-06	1.8201e-05	-//-
Novel00005	3767.05	86.8215	5.4392	0.016036	0.034595	-//-
Novel00007	1698.4	145.303	3.547	1.0092e-15	3.1439e-14	-//-
Novel00008	314.584	820.904	-1.3838	8.1395e-08	6.2076e-07	-//-
Novel00009	2309.41	862.705	1.4206	0.0099789	0.023042	-//-
ZMO_RS00025	1240.47	751.39	0.72325	0.0032678	0.0087299	--	sulfate adenylyltransferase subunit 2
ZMO_RS00040	4639.42	3100.13	0.58162	0.010671	0.024396	--	assimilatory sulfite reductase (NADPH) hemoprotein subunit
ZMO_RS00045	4655.15	2911.07	0.67728	0.011671	0.026321	--	assimilatory sulfite reductase (NADPH) flavoprotein subunit
ZMO_RS00050	497.678	179.176	1.4738	1.0932e-07	8.0691e-07	--	M48 family peptidase
ZMO_RS00060	226.648	437.917	-0.95021	0.00035245	0.0012019	--	radical SAM protein
ZMO_RS00065	284.039	612.483	-1.1086	1.5933e-05	7.567e-05	--	non-canonical purine NTP pyrophosphatase
ZMO_RS00075	17178.1	2285.18	2.9102	3.0838e-14	7.5574e-13	hrcA	HrcA family transcriptional regulator
ZMO_RS00080	10003.3	1698.31	2.5583	1.9209e-08	1.6421e-07	--	nucleotide exchange factor GrpE
ZMO_RS00085	6749.03	3079.16	1.1321	0.0058126	0.014379	--	methyltransferase domain-containing protein
ZMO_RS00090	988.063	1659.28	-0.74788	0.001512	0.0044183	--	ribulose-phosphate 3-epimerase
ZMO_RS00095	2048.63	3600.57	-0.81356	0.00026702	0.00094201	--	heparinase
ZMO_RS00120	386.881	237.863	0.70176	0.0103	0.023694	--	EamA/RhaT family transporter
ZMO_RS00130	3196.79	5785.76	-0.85588	0.0037577	0.0097967	--	bifunctional phosphoribosylaminoimidazolecarboxamide formyltransferase/IMP cyclohydrolase PurH
ZMO_RS00140	1856.95	1156.5	0.68317	0.0029387	0.0079901	--	sel1 repeat family protein
ZMO_RS00165	748.978	158.968	2.2362	5.9564e-05	0.00024547	--	DUF1491 domain-containing protein
ZMO_RS00170	1536.05	365.883	2.0698	9.8759e-13	1.8522e-11	--	nitrogen regulatory protein
ZMO_RS00175	7357.12	1407.21	2.3863	9.3751e-26	8.2054e-24	--	ribosomal subunit interface protein
ZMO_RS00195	440.941	249.497	0.82157	0.0015258	0.0044514	--	septum formation inhibitor Maf
ZMO_RS00225	314.368	190.101	0.72569	0.010985	0.024957	--	MarR family transcriptional regulator
ZMO_RS00230	620.879	123.346	2.3316	7.2151e-05	0.00028849	--	sulfite exporter TauE/SafE family protein
ZMO_RS00235	9786.75	2655.87	1.8816	5.9624e-17	2.3317e-15	--	glutamine--fructose-6-phosphate aminotransferase
ZMO_RS00250	883.803	377.42	1.2276	2.3153e-06	1.3424e-05	--	glycerate kinase
ZMO_RS00255	410.785	725.844	-0.82128	0.00094654	0.0029044	--	hypothetical protein
ZMO_RS00270	361.304	691.402	-0.93631	0.00015093	0.00056615	--	carbohydrate porin
ZMO_RS00285	175.151	98.7148	0.82726	0.013999	0.030966	--	tail tube protein
ZMO_RS00290	3380	805.138	2.0697	4.1228e-19	2.1049e-17	--	glutaredoxin 2
ZMO_RS00295	1722.92	3354.54	-0.96126	1.6504e-05	7.7779e-05	--	hypothetical protein
ZMO_RS00305	691.878	470.914	0.55505	0.021647	0.044705	--	endoribonuclease YbeY
ZMO_RS00310	4946.45	2831.6	0.80478	0.00019398	0.00070462	--	PhoH family protein
ZMO_RS00320	5002.67	2262.9	1.1445	3.4256e-07	2.3148e-06	--	chemotaxis protein CheW
ZMO_RS00325	2656.3	1320.58	1.0083	5.1208e-06	2.6891e-05	--	response regulator
ZMO_RS00345	4526.65	2254.83	1.0054	4.4807e-06	2.4081e-05	--	chemotaxis protein CheA
ZMO_RS00350	893.286	515.712	0.79256	0.00079053	0.0024795	--	STAS domain-containing protein
ZMO_RS00365	209.639	399.58	-0.93058	0.00077126	0.0024357	--	hypothetical protein
ZMO_RS00395	237.075	791.612	-1.7394	0.0039987	0.010366	--	hypothetical protein
ZMO_RS00410	426.219	1038.93	-1.2854	8.7132e-08	6.582e-07	--	MFS transporter
ZMO_RS00420	1465.88	196.384	2.9	0.00074241	0.0023608	--	NAD dependent epimerase/dehydratase
ZMO_RS00435	6487.77	3129.56	1.0518	0.019732	0.041354	--	3-isopropylmalate dehydratase large subunit
ZMO_RS00440	1883.63	934.178	1.0117	0.021047	0.043698	--	3-isopropylmalate dehydratase small subunit
ZMO_RS00445	911.894	1887.94	-1.0499	7.3904e-06	3.7524e-05	--	hypothetical protein
ZMO_RS00450	396.576	659.844	-0.73453	0.0035271	0.0092481	--	QacE family quaternary ammonium compound efflux SMR transporter
ZMO_RS00460	2372.2	1407.4	0.75319	0.0094118	0.021953	--	glycosyl transferase family 2
ZMO_RS00470	461.887	212.571	1.1196	3.6846e-05	0.00016059	--	hypothetical protein
ZMO_RS00475	2971.87	1143.58	1.3778	1.2867e-07	9.4221e-07	--	aminodeoxychorismate synthase%2C component I
ZMO_RS00480	690.705	298.331	1.2112	1.6867e-06	1.0198e-05	--	type 1 glutamine amidotransferase
ZMO_RS00485	1262.98	819.786	0.62351	0.0072393	0.017531	--	aminotransferase
ZMO_RS00495	2741.06	1296.16	1.0805	2.3532e-06	1.3559e-05	--	hydroxylamine reductase
ZMO_RS00500	234.943	121.811	0.94767	0.0027787	0.0076115	--	Na+/H+ antiporter NhaA
ZMO_RS00510	2178.95	1332.77	0.7092	0.0014915	0.0043652	--	replication-associated recombination protein A
ZMO_RS00515	3140.12	742.294	2.0808	4.9205e-05	0.00020601	--	hypothetical protein
ZMO_RS00525	1644.4	785.853	1.0652	4.9291e-06	2.6033e-05	--	Cys-tRNA(Pro) deacylase
ZMO_RS00540	272.498	830.008	-1.6069	2.139e-05	9.804e-05	--	TonB-dependent receptor
ZMO_RS00545	111.481	659.685	-2.565	1.7233e-13	3.6407e-12	--	acid phosphatase
ZMO_RS00550	202.258	786.842	-1.9599	5.6567e-07	3.7e-06	--	metallophosphoesterase
ZMO_RS00560	2498.87	567.144	2.1395	2.3227e-19	1.2198e-17	--	sel1 repeat family protein
ZMO_RS00600	2916.05	1858.59	0.6498	0.0027123	0.0074517	--	YggS family pyridoxal phosphate-dependent enzyme
ZMO_RS00605	2774.44	1586.76	0.80612	0.0012349	0.0036881	--	ABC transporter ATP-binding protein
ZMO_RS00610	4714.46	2025.38	1.2189	3.145e-08	2.5578e-07	--	L-aspartate oxidase
ZMO_RS00620	1839.31	3014.15	-0.71259	0.002194	0.0061661	--	DUF2141 domain-containing protein
ZMO_RS00625	696.661	1862.45	-1.4187	2.6219e-09	2.7856e-08	--	tRNA (guanosine(46)-N7)-methyltransferase TrmB
ZMO_RS00640	1286.26	1986.3	-0.6269	0.010714	0.02445	--	DUF2312 domain-containing protein
ZMO_RS00645	5092.08	9557.61	-0.90839	5.0554e-05	0.0002107	--	YebC/PmpR family DNA-binding transcriptional regulator
ZMO_RS00650	567.861	989.198	-0.80072	0.00062538	0.0020201	--	crossover junction endodeoxyribonuclease RuvC
ZMO_RS00655	281.801	538.216	-0.93351	0.00037067	0.001257	--	Holliday junction branch migration protein RuvA
ZMO_RS00665	2136.06	1331.9	0.68147	0.0034687	0.0091602	--	2-hydroxyacid dehydrogenase
ZMO_RS00670	1420.83	901.375	0.65653	0.012147	0.027326	--	Holliday junction branch migration DNA helicase RuvB
ZMO_RS00690	1031.3	1643.07	-0.67192	0.0032037	0.0085711	--	hypothetical protein
ZMO_RS00715	12897.7	2860.49	2.1728	3.9324e-16	1.3141e-14	--	NAD(P)-dependent oxidoreductase
ZMO_RS00735	1282.45	616.038	1.0578	1.1621e-05	5.6209e-05	--	cell division protein ZapA
ZMO_RS00740	819.498	165.234	2.3102	5.0007e-18	2.1884e-16	--	nuclear transport factor 2 family protein
ZMO_RS00750	7315.96	10590.5	-0.53365	0.014037	0.031011	--	transketolase
ZMO_RS00765	6377.26	2882.47	1.1456	1.3904e-07	1.0102e-06	--	fructose-bisphosphate aldolase
ZMO_RS00775	4175.99	8802.46	-1.0758	1.852e-06	1.1124e-05	--	adenosylhomocysteinase
ZMO_RS00780	7040.89	10478.9	-0.57366	0.010151	0.02338	--	energy-dependent translational throttle protein EttA
ZMO_RS00785	9088.16	45144.9	-2.3125	2.8719e-08	2.3778e-07	--	hypothetical protein
ZMO_RS00815	669.212	2097.82	-1.6484	3.7925e-11	5.3806e-10	--	MurR/RpiR family transcriptional regulator
ZMO_RS00830	5491.57	8539.92	-0.637	0.0029755	0.0080664	--	ribonuclease E/G
ZMO_RS00835	380.223	616.913	-0.69822	0.0077195	0.018499	--	hypothetical protein
ZMO_RS00855	5257.42	1077.48	2.2867	2.2126e-05	0.00010066	--	LexA repressor
ZMO_RS00860	3116.39	1038.25	1.5857	2.7472e-12	4.5904e-11	--	anthranilate phosphoribosyltransferase
ZMO_RS00865	2007.87	857.091	1.2281	6.3789e-08	4.8852e-07	--	type 1 glutamine amidotransferase
ZMO_RS00870	8051.19	13678.2	-0.7646	0.00076767	0.0024285	--	methyl-accepting chemotaxis protein
ZMO_RS00875	534.478	45.8828	3.5421	7.6251e-30	8.7593e-28	--	MerR family DNA-binding transcriptional regulator
ZMO_RS00885	2378.79	1352.98	0.81409	0.00036997	0.0012569	--	NAD(P)-dependent oxidoreductase
ZMO_RS00890	5608.34	3030.25	0.88813	6.7308e-05	0.0002719	--	glutamate 5-kinase
ZMO_RS00895	5550.45	3982.58	0.4789	0.023919	0.048794	obgE	GTPase ObgE
ZMO_RS00900	10324.5	2136.66	2.2726	5.735e-16	1.8493e-14	--	N-acetyltransferase
ZMO_RS00910	12637.2	23831.2	-0.91517	2.5393e-05	0.00011384	--	50S ribosomal protein L21
ZMO_RS00925	4332.72	233.341	4.2148	1.1492e-40	3.0173e-38	--	5-formyltetrahydrofolate cyclo-ligase
ZMO_RS00935	4046.35	2138.88	0.91977	4.1781e-05	0.00017818	--	helicase
ZMO_RS00940	2714.29	7257.69	-1.4189	4.7576e-10	5.8295e-09	--	ferredoxin family protein
ZMO_RS00965	989.737	1729.96	-0.80562	0.00048582	0.0016118	--	homoserine O-acetyltransferase
ZMO_RS00975	1395.03	3821.71	-1.4539	1.3437e-10	1.7392e-09	--	DNA polymerase I
ZMO_RS00980	557.978	1549.37	-1.4734	2.6336e-10	3.2929e-09	--	polysaccharide biosynthesis protein
ZMO_RS00995	3742.73	927.723	2.0123	1.9045e-14	4.9302e-13	--	hypothetical protein
ZMO_RS01000	1114.47	1710.6	-0.61814	0.0072546	0.017545	--	23S rRNA (guanosine(2251)-2'-O)-methyltransferase RlmB
ZMO_RS01015	12501.2	8538.99	0.54993	0.010902	0.024799	--	PDZ domain-containing protein
ZMO_RS01020	2877.12	1507.57	0.9324	2.4803e-05	0.00011174	--	ATP-binding protein
ZMO_RS01055	911.346	1378.01	-0.59651	0.012411	0.027886	--	hypothetical protein
ZMO_RS01060	6492.37	19035.9	-1.5519	2.1215e-09	2.2937e-08	--	HU family DNA-binding protein
ZMO_RS01065	5170.5	642.47	3.0086	6.3017e-37	1.053e-34	--	HslU--HslV peptidase proteolytic subunit
ZMO_RS01070	16701.4	2114.61	2.9815	1.7096e-33	2.6185e-31	--	ATP-dependent protease ATPase subunit HslU
ZMO_RS01075	7557.54	11995.4	-0.66649	0.0033533	0.0089106	--	50S ribosomal protein L33
ZMO_RS01090	3318.49	6102.12	-0.87879	9.6031e-05	0.00037316	--	major intrinsic protein
ZMO_RS01095	168.653	360.557	-1.0962	5.1779e-05	0.00021436	--	channel protein TolC
ZMO_RS01100	278.474	564.322	-1.019	0.00064768	0.0020848	--	type I secretion system permease/ATPase
ZMO_RS01110	3902.21	2481.49	0.65309	0.0086293	0.02036	--	D-lactate dehydrogenase
ZMO_RS01115	5810.19	2461.05	1.2393	1.6107e-08	1.4097e-07	--	DNA-binding response regulator
ZMO_RS01120	1292.45	702.387	0.87977	0.0003492	0.001193	--	ATP-binding protein
ZMO_RS01130	317.224	181.218	0.80778	0.0074374	0.017916	--	cytochrome C biogenesis protein CcmB
ZMO_RS01135	114.502	247.367	-1.1113	0.00028875	0.0010109	--	hypothetical protein
ZMO_RS01140	590.028	1674.64	-1.505	0.00010172	0.00039276	--	hypothetical protein
ZMO_RS01145	944.806	1751.46	-0.89047	0.0077562	0.018562	--	hypothetical protein
ZMO_RS01150	453.5	742.243	-0.71079	0.01653	0.035545	--	hypothetical protein
ZMO_RS01190	4118.4	12468.1	-1.5981	1.648e-12	2.9409e-11	--	S-adenosylmethionine synthase
ZMO_RS01200	632.632	1136.39	-0.84502	0.00041247	0.0013784	--	LPS export ABC transporter ATP-binding protein
ZMO_RS01205	690.071	1333.44	-0.95033	8.3451e-05	0.00032844	--	organic solvent tolerance protein OstA
ZMO_RS01210	864.053	1827.52	-1.0807	4.5122e-06	2.4179e-05	--	LPS export ABC transporter periplasmic protein LptC
ZMO_RS01215	2915.95	5105.84	-0.80818	0.00031812	0.0010949	--	ribonuclease D
ZMO_RS01240	750.767	1150.76	-0.61615	0.008081	0.019239	--	RND transporter
ZMO_RS01245	2318.2	991.322	1.2256	3.0901e-08	2.5243e-07	--	SIMPL domain-containing protein
ZMO_RS01255	3972.26	278.73	3.833	7.6635e-53	4.6952e-50	--	DUF445 domain-containing protein
ZMO_RS01260	355.237	1340.17	-1.9156	2.2168e-15	6.4675e-14	--	prolipoprotein diacylglyceryl transferase
ZMO_RS01265	976.294	426.352	1.1953	1.914e-06	1.1385e-05	--	sugar porter family MFS transporter
ZMO_RS01285	2496.92	939.753	1.4098	8.0656e-10	9.2654e-09	--	hypothetical protein
ZMO_RS01290	1839.14	2821.54	-0.61745	0.0090781	0.021256	--	phosphoribosylamine--glycine ligase
ZMO_RS01295	2749.56	1511.39	0.86333	0.00012109	0.00046175	--	exodeoxyribonuclease VII large subunit
ZMO_RS01305	18.3185	106.297	-2.5367	1.11e-08	1.0356e-07	--	aryl-sulfate sulfotransferase
ZMO_RS01310	117.157	494.983	-2.0789	1.2314e-13	2.7269e-12	--	ferrochelatase
ZMO_RS01315	208.932	618.011	-1.5646	4.7329e-09	4.7536e-08	--	stress responsive protein
ZMO_RS01320	562.071	1259.84	-1.1644	1.2014e-06	7.4856e-06	--	glycosyltransferase family 1 protein
ZMO_RS01325	389.068	801.348	-1.0424	2.5697e-05	0.00011492	--	capsular polysaccharide biosynthesis protein
ZMO_RS01330	2451.48	425.75	2.5256	0.0037669	0.0098068	--	KR domain-containing protein
ZMO_RS01335	1758.02	770.245	1.1906	1.4022e-07	1.0147e-06	--	pyrroline-5-carboxylate reductase
ZMO_RS01340	2393.05	1114.89	1.1019	1.3805e-06	8.4298e-06	--	amidohydrolase
ZMO_RS01345	963.41	366.08	1.396	1.5908e-08	1.399e-07	--	2-amino-thiazoline-4-carboxylic acid hydrolase
ZMO_RS01375	228.447	517.017	-1.1784	3.7435e-05	0.0001619	--	dihydrofolate reductase
ZMO_RS01385	7615.61	11173.7	-0.55307	0.013929	0.030882	--	isoleucine--tRNA ligase
ZMO_RS01410	2222.78	4479.07	-1.0108	7.3014e-06	3.7175e-05	--	elongation factor P
ZMO_RS01415	2134.06	4533.82	-1.0871	1.9254e-06	1.1404e-05	--	inositol monophosphatase
ZMO_RS01425	9816.26	2839.46	1.7896	3.2454e-11	4.7342e-10	--	DUF882 domain-containing protein
ZMO_RS01480	4450.33	2652.47	0.74657	0.0008187	0.0025461	--	RNA chaperone Hfq
ZMO_RS01500	1764.45	2483.27	-0.49302	0.017491	0.037296	--	DUF4011 domain-containing protein
ZMO_RS01510	2396.89	1596.09	0.58663	0.0077759	0.018585	--	KR domain-containing protein
ZMO_RS01515	3179.78	1704.36	0.8997	6.9671e-05	0.00028082	--	DNA mismatch repair endonuclease MutL
ZMO_RS01525	1337.58	2291.27	-0.77652	0.00050205	0.0016597	--	rod shape-determining protein MreC
ZMO_RS01530	298.255	502.536	-0.75268	0.0031926	0.0085663	--	hypothetical protein
ZMO_RS01535	1728.33	1089.99	0.66506	0.0040743	0.010518	--	penicillin-binding protein 2
ZMO_RS01550	9898.96	917.294	3.4318	6.4875e-47	2.981e-44	--	excinuclease ABC subunit B
ZMO_RS01585	163.893	65.7301	1.3181	0.00030465	0.0010555	--	aspartate/glutamate racemase family protein
ZMO_RS01595	192.954	105.354	0.87301	0.0061749	0.015211	--	hypothetical protein
ZMO_RS01615	36784.9	6775.63	2.4407	3.7191e-08	2.9721e-07	--	endopeptidase La
ZMO_RS01725	543.695	914.593	-0.75033	0.0015431	0.0044948	--	ribosomal RNA large subunit methyltransferase E
ZMO_RS01740	49010.7	4487.64	3.4491	1.8827e-06	1.1235e-05	--	ATP-dependent Clp protease ATP-binding subunit ClpA
ZMO_RS01750	10005.4	6137.42	0.70507	0.0014134	0.0041564	--	GcrA cell cycle regulator
ZMO_RS01775	751.278	3590.59	-2.2568	2.0871e-22	1.4208e-20	--	MarC family protein
ZMO_RS01790	355.465	206.769	0.78169	0.0056489	0.013993	--	cell division ATP-binding protein FtsE
ZMO_RS01800	521.471	309.868	0.75093	0.0046363	0.011738	--	YdcF family protein
ZMO_RS01810	1765.22	2758.97	-0.64428	0.0042227	0.01084	--	protein TyrC
ZMO_RS01815	3892.78	5957.83	-0.61399	0.0053014	0.013221	--	histidinol-phosphate aminotransferase
ZMO_RS01845	1949.07	475.949	2.0339	3.0459e-13	6.2902e-12	--	SUF system Fe-S cluster assembly protein
ZMO_RS01850	824.165	223.92	1.8799	4.1287e-13	8.2484e-12	--	iron-sulfur cluster assembly accessory protein
ZMO_RS01855	2308.25	1038.21	1.1527	0.00010171	0.00039276	--	pyrimidine 5'-nucleotidase
ZMO_RS01870	616.011	1582.06	-1.3608	1.3688e-08	1.2273e-07	--	guanylate kinase
ZMO_RS01875	8556.23	3698.93	1.2099	6.1819e-08	4.7672e-07	--	glycine zipper 2TM domain-containing protein
ZMO_RS01885	226.205	433.78	-0.93933	0.00058052	0.0018851	--	hypothetical protein
ZMO_RS01895	1636.77	567.421	1.5284	8.1276e-11	1.0825e-09	--	hypothetical protein
ZMO_RS01900	4202.27	1998.09	1.0725	1.1667e-06	7.3439e-06	--	ATPase
ZMO_RS01925	1076.14	2232.91	-1.0531	4.7946e-06	2.5493e-05	--	MBOAT family protein
ZMO_RS01930	254.449	448.74	-0.8185	0.002228	0.0062425	--	hypothetical protein
ZMO_RS01935	6042.9	2683.93	1.1709	0.014236	0.031337	--	cell wall hydrolase
ZMO_RS01955	4634.95	6997.43	-0.59427	0.0075287	0.018089	--	ribosome biogenesis GTPase Der
ZMO_RS01965	925.231	1389.18	-0.58634	0.0078603	0.018738	--	(2Fe-2S)-binding protein
ZMO_RS01970	515.758	801.691	-0.63635	0.0075867	0.018204	--	glutamate uptake regulatory protein
ZMO_RS01975	297.923	544.974	-0.87125	0.00078829	0.0024795	--	lipoprotein-releasing system ATP-binding protein LolD
ZMO_RS01980	1014.33	1700.81	-0.74569	0.0012605	0.0037548	--	lipoprotein-releasing system transmembrane subunit%2C LolC/LolE family
ZMO_RS01985	3072.76	4533.7	-0.56115	0.015398	0.033572	--	proline--tRNA ligase
ZMO_RS01990	3119.36	10060.3	-1.6894	9.5931e-14	2.1503e-12	--	CTP synthetase
ZMO_RS01995	1522.83	3295.72	-1.1138	1.0136e-06	6.402e-06	--	preprotein translocase subunit SecG
ZMO_RS02015	4269.54	1168.02	1.87	1.3115e-08	1.1899e-07	--	hypothetical protein
ZMO_RS02020	1045.14	1577.39	-0.59384	0.011845	0.026679	--	LysR family transcriptional regulator
ZMO_RS02030	2683.22	1647.01	0.70411	0.001645	0.0047614	--	6%2C7-dimethyl-8-ribityllumazine synthase
ZMO_RS02035	7624.78	3524.08	1.1134	3.2563e-07	2.2085e-06	--	3%2C4-dihydroxy-2-butanone-4-phosphate synthase
ZMO_RS02040	2994.58	1654.62	0.85585	8.8473e-05	0.00034672	--	riboflavin synthase
ZMO_RS02070	211.555	330.908	-0.64539	0.02044	0.042656	--	hypothetical protein
ZMO_RS02080	3010.91	4505.35	-0.58144	0.012558	0.028148	--	homoserine dehydrogenase
ZMO_RS02085	735.891	355.849	1.0482	2.0189e-05	9.2767e-05	--	MgtC/SapB family protein
ZMO_RS02090	4329.63	2896.5	0.57993	0.0066574	0.016272	--	acyl-CoA dehydrogenase
ZMO_RS02095	1987.31	1178.74	0.75357	0.00097427	0.0029697	--	hypothetical protein
ZMO_RS02100	1387.97	872.647	0.66951	0.0040976	0.010563	--	CoA ester lyase
ZMO_RS02105	332.005	738.759	-1.1539	7.163e-06	3.6571e-05	--	hypothetical protein
ZMO_RS02120	1999.44	919.933	1.12	6.3084e-07	4.0684e-06	--	S9 family peptidase
ZMO_RS02140	831.973	3405.4	-2.0332	1.7009e-18	7.8155e-17	--	Bcr/CflA family drug resistance efflux transporter
ZMO_RS02165	4616.72	9202.61	-0.99517	5.8334e-06	3.0373e-05	--	penicillin-binding protein
ZMO_RS02170	1111.44	2259.41	-1.0235	9.2462e-06	4.6181e-05	--	hypothetical protein
ZMO_RS02175	223.265	481.044	-1.1074	3.0347e-05	0.00013473	--	GtrA family protein
ZMO_RS02180	711.297	2195.03	-1.6257	6.0215e-13	1.1774e-11	--	hypothetical protein
ZMO_RS02185	2407.21	5164.9	-1.1014	9.1006e-07	5.7879e-06	--	glycosyltransferase family 2 protein
ZMO_RS02190	524.553	1605.34	-1.6137	1.5747e-11	2.392e-10	--	RNA pseudouridine synthase
ZMO_RS02195	460.906	678.926	-0.55878	0.024012	0.048929	--	aminoacyl-tRNA hydrolase
ZMO_RS02220	1613.44	745.922	1.113	2.858e-06	1.6213e-05	--	acyl-CoA thioesterase
ZMO_RS02230	1033.64	1489.29	-0.52689	0.015729	0.034088	--	phosphatase PAP2 family protein
ZMO_RS02235	17836.5	29841.2	-0.74247	0.00092626	0.0028517	--	30S ribosomal protein S12
ZMO_RS02240	10119.7	16366.5	-0.69357	0.0021268	0.0060047	--	30S ribosomal protein S7
ZMO_RS02245	61122.4	121473	-0.99087	9.6402e-06	4.8018e-05	--	elongation factor G
ZMO_RS02250	87684.7	158267	-0.85196	0.00098269	0.0029904	--	elongation factor Tu
ZMO_RS02255	1581.06	9661.82	-2.6114	1.0338e-29	1.1177e-27	--	30S ribosomal protein S10
ZMO_RS02260	23331.1	48226.9	-1.0476	2.1925e-06	1.2834e-05	--	50S ribosomal protein L3
ZMO_RS02265	8749.16	18955.7	-1.1154	5.4394e-07	3.5706e-06	--	50S ribosomal protein L4
ZMO_RS02270	1917.15	4864.79	-1.3434	2.5458e-09	2.7205e-08	--	50S ribosomal protein L23
ZMO_RS02275	20020.2	37677.8	-0.91225	3.6958e-05	0.00016059	--	50S ribosomal protein L2
ZMO_RS02280	699.098	2021.94	-1.5322	3.9449e-11	5.5349e-10	--	30S ribosomal protein S19
ZMO_RS02285	3642.95	8053.87	-1.1446	2.2966e-07	1.5968e-06	--	50S ribosomal protein L22
ZMO_RS02290	16476.8	29068.4	-0.81902	0.00019342	0.00070462	--	30S ribosomal protein S3
ZMO_RS02295	6859.49	15098.3	-1.1382	3.1191e-07	2.1233e-06	--	50S ribosomal protein L16
ZMO_RS02300	151.537	265.884	-0.81113	0.0063199	0.015488	--	50S ribosomal protein L29
ZMO_RS02305	287.293	659.831	-1.1996	1.0753e-05	5.2986e-05	--	30S ribosomal protein S17
ZMO_RS02310	3950.6	9035.63	-1.1936	1.3197e-05	6.333e-05	--	50S ribosomal protein L14
ZMO_RS02315	2346.91	5839.95	-1.3152	4.0426e-09	4.1051e-08	--	50S ribosomal protein L24
ZMO_RS02320	11043.1	23357.5	-1.0807	0.00019369	0.00070462	--	50S ribosomal protein L5
ZMO_RS02325	4041.33	10327.8	-1.3536	3.9301e-09	4.013e-08	--	30S ribosomal protein S14
ZMO_RS02330	3851.84	9839.44	-1.353	1.1426e-05	5.5704e-05	--	30S ribosomal protein S8
ZMO_RS02335	6189.38	12946.6	-1.0647	3.9228e-05	0.00016807	--	50S ribosomal protein L6
ZMO_RS02340	2233.33	3982.8	-0.83459	0.00016779	0.00062051	--	50S ribosomal protein L18
ZMO_RS02350	353.025	918.945	-1.3802	2.3869e-08	2.0124e-07	--	50S ribosomal protein L30
ZMO_RS02355	10721.4	19399.6	-0.85553	0.00019248	0.00070334	--	50S ribosomal protein L15
ZMO_RS02360	7446.49	15815.6	-1.0867	1.9296e-06	1.1404e-05	--	preprotein translocase subunit SecY
ZMO_RS02365	2621.84	6212.66	-1.2446	6.1987e-08	4.7672e-07	--	adenylate kinase
ZMO_RS02370	9135.8	31991.1	-1.8081	1.4611e-15	4.4759e-14	--	30S ribosomal protein S13
ZMO_RS02375	3918.28	14753.6	-1.9128	5.9116e-17	2.3317e-15	--	30S ribosomal protein S11
ZMO_RS02380	12794.1	43671.5	-1.7712	6.2612e-15	1.7176e-13	--	DNA-directed RNA polymerase subunit alpha
ZMO_RS02385	5572.91	18625.5	-1.7408	1.6012e-14	4.2043e-13	--	50S ribosomal protein L17
ZMO_RS02390	95.3664	227.948	-1.2571	3.5684e-05	0.00015616	--	tRNA-Ser
ZMO_RS02420	1245.43	740.714	0.74965	0.0017931	0.0051256	--	voltage-gated chloride channel protein
ZMO_RS02430	21417.2	63321.5	-1.5639	3.4999e-12	5.6928e-11	--	polyribonucleotide nucleotidyltransferase
ZMO_RS02435	2740.44	6775.78	-1.306	7.4401e-09	7.1973e-08	--	30S ribosomal protein S15
ZMO_RS02440	1545.55	4558.93	-1.5606	1.2237e-12	2.2269e-11	--	tRNA pseudouridine(55) synthase TruB
ZMO_RS02450	577.185	1001.81	-0.79551	0.0008081	0.0025217	--	ribosome-binding factor A
ZMO_RS02455	18523.4	54061.5	-1.5453	2.3499e-12	4.0365e-11	--	translation initiation factor IF-2
ZMO_RS02460	2510.26	9342.58	-1.896	2.1162e-17	8.8397e-16	--	DUF448 domain-containing protein
ZMO_RS02470	3148.23	4573.71	-0.53882	0.0097936	0.022671	--	ribosome maturation factor
ZMO_RS02490	2921.98	1505.52	0.95668	0.0012753	0.0037867	--	TonB-dependent receptor
ZMO_RS02500	1243.85	1976.21	-0.66793	0.006208	0.015255	--	chorismate mutase
ZMO_RS02510	1918.01	2772.96	-0.53182	0.022101	0.045591	--	ATP-dependent helicase HrpB
ZMO_RS02525	113.693	217.772	-0.93768	0.0027964	0.0076484	--	hypothetical protein
ZMO_RS02530	253.429	436.777	-0.78531	0.0041603	0.010695	--	succinate dehydrogenase cytochrome b subunit
ZMO_RS02545	9784.38	3302.92	1.5667	7.0145e-13	1.3291e-11	--	sulfonate ABC transporter permease
ZMO_RS02550	5553.9	2154.66	1.366	4.6505e-10	5.7367e-09	--	nitrate ABC transporter ATP-binding protein
ZMO_RS02565	430.235	1336.21	-1.6349	9.2688e-12	1.4437e-10	--	16S rRNA (guanine(966)-N(2))-methyltransferase RsmD
ZMO_RS02570	1738.6	5789.85	-1.7356	1.5483e-14	4.1244e-13	--	RNA-binding protein S4
ZMO_RS02575	1676.54	2483.37	-0.56681	0.017982	0.038165	--	dicarboxylate/amino acid:cation symporter
ZMO_RS02580	848.565	1453.5	-0.77644	0.00080371	0.0025123	--	MFS transporter
ZMO_RS02585	1776.97	3661.69	-1.0431	3.8864e-06	2.126e-05	--	bifunctional folylpolyglutamate synthase/dihydrofolate synthase
ZMO_RS02630	828.325	476.725	0.79704	0.00091774	0.0028302	--	iron-sulfur cluster assembly scaffold protein
ZMO_RS02635	238.971	143.814	0.73263	0.013094	0.029207	--	DUF423 domain-containing protein
ZMO_RS02645	1941.23	3411.08	-0.81326	0.00034029	0.0011647	--	shikimate kinase
ZMO_RS02655	1902.23	1193.25	0.67279	0.0039279	0.010197	--	tyrosine recombinase XerD
ZMO_RS02665	696.238	1227.9	-0.81854	0.00038438	0.0012939	--	hybrid sensor histidine kinase/response regulator
ZMO_RS02675	1209.77	2228.95	-0.88163	0.00051783	0.0017026	--	flagellar motor protein MotB
ZMO_RS02680	1808.29	3335.17	-0.88313	0.001236	0.0036881	--	flagellar motor stator protein MotA
ZMO_RS02695	479.081	1192.2	-1.3153	0.00022651	0.00080683	--	flagellar protein FlgJ
ZMO_RS02700	2205.45	4687.34	-1.0877	0.002681	0.0073877	--	flagellar P-ring protein
ZMO_RS02705	1114.17	2489.29	-1.1598	0.0016774	0.0048325	--	flagellar L-ring protein
ZMO_RS02710	2143.74	4747.55	-1.1471	4.7966e-05	0.00020174	--	flagellar basal-body rod protein FlgG
ZMO_RS02715	3563.11	7682.75	-1.1085	9.2303e-05	0.00036097	--	flagellar basal-body rod protein FlgF
ZMO_RS02720	10563.2	18689.1	-0.82314	0.014183	0.031257	--	flagellar hook protein FlgE
ZMO_RS02725	4340.25	6642.5	-0.61395	0.0083363	0.01977	--	flagellar hook capping protein
ZMO_RS02730	1010.67	1726.51	-0.77254	0.00089156	0.0027587	--	flagellar basal body rod protein FlgC
ZMO_RS02735	2340.45	3531.87	-0.59365	0.008966	0.02102	--	flagellar basal body rod protein FlgB
ZMO_RS02760	919.43	631.879	0.54109	0.023128	0.047443	--	flagellar biosynthesis anti-sigma factor FlgM
ZMO_RS02770	9371.99	6590.55	0.50796	0.019908	0.041676	--	flagellar biosynthesis protein FlhA
ZMO_RS02795	4938.6	1053.03	2.2296	1.973e-15	5.8489e-14	--	flagellin
ZMO_RS02800	11700.7	7353.16	0.67016	0.0054682	0.0136	--	sigma-54-dependent Fis family transcriptional regulator
ZMO_RS02875	605.059	364.176	0.73244	0.0031821	0.0085507	--	flagellar biosynthetic protein FliR
ZMO_RS02880	1105.85	607.253	0.86478	0.00030096	0.0010457	--	flagellar biosynthesis protein FlhB
ZMO_RS02885	3223.07	1963.9	0.71471	0.0012339	0.0036881	--	flagellar hook protein FliD
ZMO_RS02900	3043.01	5622.72	-0.88577	7.2201e-05	0.00028849	--	polysaccharide deacetylase
ZMO_RS02905	1038.6	3216.93	-1.631	2.473e-12	4.2087e-11	--	adenosine deaminase
ZMO_RS02910	1914.45	2879.7	-0.58899	0.010622	0.024344	--	phosphoribosyltransferase
ZMO_RS02930	119002	18348	2.6973	1.8732e-32	2.4593e-30	--	molecular chaperone DnaK
ZMO_RS02935	12194.9	2556.45	2.2541	8.7378e-08	6.582e-07	--	molecular chaperone DnaJ
ZMO_RS02940	3095.37	6439.52	-1.0568	6.1536e-05	0.0002519	--	adenylosuccinate lyase
ZMO_RS02960	4675.74	1567.34	1.5769	2.8475e-12	4.715e-11	--	DUF1318 domain-containing protein
ZMO_RS02990	1575.42	1082.02	0.54201	0.01961	0.041226	--	excinuclease ABC subunit C
ZMO_RS03000	578.87	197.507	1.5513	3.3481e-08	2.7109e-07	--	hypothetical protein
ZMO_RS03005	1817.7	1188.63	0.61281	0.0047621	0.012023	--	LysR family transcriptional regulator
ZMO_RS03025	832.159	489.37	0.76593	0.0012003	0.0036049	--	type I-F CRISPR-associated endonuclease Cas1
ZMO_RS03030	3355.31	1821.01	0.8817	6.7262e-05	0.0002719	--	type I-F CRISPR-associated helicase Cas3
ZMO_RS03060	5634.31	14168.6	-1.3304	0.015137	0.033082	--	acetolactate synthase large subunit
ZMO_RS03065	121.409	244.246	-1.0085	0.0011595	0.0034995	--	transporter
ZMO_RS03075	12521.7	34735.2	-1.472	1.9902e-05	9.1911e-05	--	glucose-fructose oxidoreductase
ZMO_RS03080	2213	4263.88	-0.94616	3.4526e-05	0.00015218	--	FADH(2)-oxidizing methylenetetrahydrofolate--tRNA-(uracil(54)-C(5))-methyltransferase TrmFO
ZMO_RS03090	9533.8	1607.94	2.5678	4.5726e-06	2.4431e-05	--	organic hydroperoxide resistance protein
ZMO_RS03095	8918.62	3300.85	1.434	3.6969e-11	5.3085e-10	--	hypothetical protein
ZMO_RS03105	540.129	1434.63	-1.4093	4.9127e-09	4.8808e-08	--	hypothetical protein
ZMO_RS03115	98.7332	186.64	-0.91865	0.0053103	0.013225	--	QacE family quaternary ammonium compound efflux SMR transporter
ZMO_RS03135	6857.18	13310.8	-0.95691	2.3244e-05	0.00010523	--	acyl-CoA synthetase
ZMO_RS03140	690.035	319.373	1.1114	1.5467e-05	7.365e-05	--	recombinase RecX
ZMO_RS03175	5789.46	2963.6	0.96608	1.1495e-05	5.5892e-05	--	RNA degradosome polyphosphate kinase
ZMO_RS03185	1094.02	1910.08	-0.804	0.00090045	0.0027816	--	ribonuclease D
ZMO_RS03190	4338.32	9739.88	-1.1668	2.3248e-07	1.6064e-06	--	aspartate--tRNA(Asp/Asn) ligase
ZMO_RS03195	969.694	1939.23	-0.99988	1.6232e-05	7.6893e-05	--	hypothetical protein
ZMO_RS03225	1318.94	827.311	0.67288	0.0096573	0.02244	--	tRNA-Trp
ZMO_RS03240	9596.38	14144	-0.55963	0.011064	0.025044	--	50S ribosomal protein L11
ZMO_RS03245	13274.6	19590.7	-0.5615	0.010812	0.024624	--	50S ribosomal protein L1
ZMO_RS03250	16187	46947.2	-1.5362	3.4613e-12	5.6802e-11	--	50S ribosomal protein L10
ZMO_RS03255	12876.6	44420.3	-1.7865	3.562e-14	8.5025e-13	--	50S ribosomal protein L7/L12
ZMO_RS03265	108662	65988.9	0.71955	0.00095275	0.0029166	--	DNA-directed RNA polymerase subunit beta
ZMO_RS03275	107.097	52.3519	1.0326	0.0097762	0.022659	--	acetyltransferase
ZMO_RS03285	4429.67	7408.72	-0.74202	0.0010009	0.0030357	--	acetyl-CoA carboxylase biotin carboxylase subunit
ZMO_RS03290	1333.87	2465.74	-0.88641	9.3892e-05	0.0003664	--	acetyl-CoA carboxylase biotin carboxyl carrier protein
ZMO_RS03295	812.423	1505.26	-0.88971	0.00015162	0.00056759	--	type II 3-dehydroquinate dehydratase
ZMO_RS03310	7893.1	1797.74	2.1344	5.7107e-11	7.7868e-10	--	CsbD family protein
ZMO_RS03315	1788.58	3271.47	-0.87113	0.00013087	0.00049699	--	peptide chain release factor 3
ZMO_RS03320	358.04	704.785	-0.97706	8.6627e-05	0.00034021	--	transporter
ZMO_RS03345	11188.5	1472	2.9262	3.3871e-08	2.7305e-07	--	cysteine synthase A
ZMO_RS03350	6167.45	1805.49	1.7723	2.3476e-15	6.7421e-14	--	RNA polymerase sigma factor RpoH
ZMO_RS03370	3234.37	1283.57	1.3333	5.2322e-09	5.1703e-08	--	glutaredoxin 3
ZMO_RS03375	4724.57	1335.44	1.8229	2.4913e-15	7.0447e-14	--	sterol-binding protein
ZMO_RS03380	1020.6	3181.87	-1.6405	1.2008e-12	2.2071e-11	--	tetratricopeptide repeat protein
ZMO_RS03405	2020.83	1011.26	0.9988	1.3648e-05	6.5324e-05	--	hypothetical protein
ZMO_RS03410	2457.21	1406.48	0.80493	0.00021176	0.00076017	--	alpha/beta hydrolase
ZMO_RS03420	2220.23	1180.64	0.91113	5.1783e-05	0.00021436	--	bifunctional uridylyltransferase/uridylyl-removing protein
ZMO_RS03430	237.184	136.807	0.79386	0.0078217	0.018671	--	hypothetical protein
ZMO_RS03435	1417.6	2205.87	-0.63789	0.0049079	0.012357	--	tRNA 2-thiouridine(34) synthase MnmA
ZMO_RS03440	998.85	1814.78	-0.86146	0.00010993	0.0004236	--	magnesium transporter
ZMO_RS03445	2790.72	4613.01	-0.72507	0.0015907	0.0046115	--	peptidylprolyl isomerase
ZMO_RS03450	800.52	491.227	0.70455	0.0031754	0.0085453	--	LysR family transcriptional regulator
ZMO_RS03455	1105.98	1611	-0.54262	0.019192	0.0405	--	methyltransferase type 12
ZMO_RS03470	705.056	1236.44	-0.81038	0.00052509	0.0017234	--	efflux RND transporter periplasmic adaptor subunit
ZMO_RS03475	743.363	1750.89	-1.2359	2.3023e-07	1.5968e-06	--	RND transporter
ZMO_RS03480	2006.84	4189.42	-1.0618	3.7297e-06	2.0463e-05	--	LysR family transcriptional regulator
ZMO_RS03490	5630	8262.58	-0.55346	0.017684	0.03762	gatA	Asp-tRNA(Asn)/Glu-tRNA(Gln) amidotransferase GatCAB subunit A
ZMO_RS03495	715.543	1103.25	-0.62465	0.0070801	0.017168	--	Asp-tRNA(Asn)/Glu-tRNA(Gln) amidotransferase subunit GatC
ZMO_RS03500	410.097	673.14	-0.71494	0.0068161	0.016593	--	Holliday junction resolvase RuvX
ZMO_RS03505	380.706	590.141	-0.63238	0.020446	0.042656	--	hypothetical protein
ZMO_RS03520	1246.3	419.577	1.5706	4.7362e-05	0.00019966	--	TonB-dependent receptor
ZMO_RS03550	301.876	668.353	-1.1467	6.6881e-06	3.4433e-05	--	NAD(P)-dependent oxidoreductase
ZMO_RS03555	289.332	586.731	-1.02	4.4966e-05	0.00019043	--	TolC family protein
ZMO_RS03560	75.694	258.62	-1.7726	5.1213e-08	4.0226e-07	--	ABC transporter permease
ZMO_RS03565	262.844	836.262	-1.6697	3.4627e-11	5.0114e-10	--	ABC transporter ATP-binding protein/permease
ZMO_RS03570	233.52	765.75	-1.7133	5.6527e-11	7.7868e-10	--	secretion protein HlyD
ZMO_RS03585	1056.04	1715.58	-0.70003	0.0031274	0.0084284	--	N-acetyl-gamma-glutamyl-phosphate reductase
ZMO_RS03600	1448.11	3856.17	-1.413	6.5839e-10	7.6109e-09	--	30S ribosomal protein S12 methylthiotransferase RimO
ZMO_RS03650	1441.41	2092.24	-0.53757	0.013469	0.029935	--	UDP-glucose/GDP-mannose dehydrogenase family protein
ZMO_RS03655	4268.02	10475	-1.2953	8.4359e-09	8.0756e-08	--	phosphoribosylformylglycinamidine synthase subunit PurL
ZMO_RS03685	2032.37	3139.66	-0.62744	0.00352	0.0092424	--	penicillin-binding protein 2
ZMO_RS03695	1522.88	2847.45	-0.90287	6.2922e-05	0.00025698	--	UDP-N-acetylmuramoyl-tripeptide--D-alanyl-D-alanine ligase
ZMO_RS03700	683.25	1763.79	-1.3682	4.9001e-09	4.8808e-08	--	phospho-N-acetylmuramoyl-pentapeptide-transferase
ZMO_RS03705	1434.48	2959.72	-1.0449	5.1047e-06	2.6884e-05	--	UDP-N-acetylmuramoyl-L-alanine--D-glutamate ligase
ZMO_RS03710	922.945	1898.26	-1.0404	0.00030931	0.0010666	--	putative lipid II flippase FtsW
ZMO_RS03715	1512.19	2687.43	-0.82959	0.00029972	0.0010433	--	undecaprenyldiphospho-muramoylpentapeptide beta-N- acetylglucosaminyltransferase
ZMO_RS03720	1741.94	4244.16	-1.2848	7.9629e-07	5.0996e-06	--	UDP-N-acetylmuramate--L-alanine ligase
ZMO_RS03725	1239.08	2597.41	-1.0678	1.0854e-05	5.334e-05	--	UDP-N-acetylenolpyruvoylglucosamine reductase
ZMO_RS03730	1324.56	2390.54	-0.85183	0.0067167	0.016373	--	D-alanine--D-alanine ligase
ZMO_RS03735	746.789	1652.92	-1.1462	1.1936e-06	7.4621e-06	--	cell division protein FtsQ
ZMO_RS03765	3556.7	5600.11	-0.65492	0.0035394	0.0092671	--	arginine--tRNA ligase
ZMO_RS03775	6506.31	13605.9	-1.0643	3.0827e-06	1.7294e-05	--	alanine--tRNA ligase
ZMO_RS03785	4873.37	10985.1	-1.1726	3.6909e-05	0.00016059	--	carbohydrate porin
ZMO_RS03805	934.832	1583.38	-0.76023	0.0012276	0.0036809	--	tRNA preQ1(34) S-adenosylmethionine ribosyltransferase-isomerase QueA
ZMO_RS03815	482.41	1329.67	-1.4627	1.2867e-09	1.4246e-08	--	phosphopantetheine adenylyltransferase
ZMO_RS03820	3328.05	9371.26	-1.4936	5.7194e-11	7.7868e-10	--	polyprenyl synthetase family protein
ZMO_RS03825	588.605	1380.86	-1.2302	2.7638e-07	1.8884e-06	--	exodeoxyribonuclease 7 small subunit
ZMO_RS03830	2513.35	8162.78	-1.6994	5.7602e-14	1.3234e-12	--	DUF1013 domain-containing protein
ZMO_RS03850	4893.3	2983.22	0.71394	0.0030521	0.0082496	--	nucleoid-associated protein%2C YbaB/EbfC family
ZMO_RS03855	718.039	1501.4	-1.0642	5.7129e-06	2.9831e-05	--	dCTP deaminase
ZMO_RS03865	2827.04	1618.86	0.80431	0.00028013	0.00098635	--	replicative DNA helicase
ZMO_RS03870	1996.87	5969.68	-1.5799	2.1726e-12	3.8031e-11	--	cation transporter
ZMO_RS03875	1941.12	4710.37	-1.2789	1.9372e-05	8.9914e-05	--	NAD-dependent dehydratase
ZMO_RS03880	1023.19	1889.49	-0.88492	0.00019824	0.00071866	--	glycosyl transferase family 2
ZMO_RS03885	1200.28	1810.04	-0.59265	0.02373	0.048515	--	squalene synthase HpnC
ZMO_RS03890	1081.5	1949.9	-0.85037	0.00066381	0.002133	--	squalene synthase HpnD
ZMO_RS03895	1040	2095.21	-1.0105	0.00079003	0.0024795	--	hypothetical protein
ZMO_RS03900	1291.69	3830.43	-1.5682	5.5924e-09	5.4967e-08	--	squalene--hopene cyclase
ZMO_RS03910	7083.04	14583.6	-1.0419	3.0117e-06	1.7033e-05	--	hopanoid biosynthesis associated radical SAM protein HpnH
ZMO_RS03915	5575.18	9583.83	-0.78158	0.00045293	0.0015109	--	4-hydroxy-3-methylbut-2-enyl diphosphate reductase
ZMO_RS03920	4205.38	2723.35	0.62685	0.0193	0.040682	--	hopanoid biosynthesis associated membrane protein HpnM
ZMO_RS03930	7064.76	3847.87	0.87658	3.1203e-05	0.0001382	--	chemotaxis-specific protein-glutamate methyltransferase CheB
ZMO_RS03945	6402.79	21055.2	-1.7174	5.5152e-14	1.2996e-12	--	30S ribosomal protein S9
ZMO_RS03950	6341.38	21682.2	-1.7736	5.3401e-15	1.4871e-13	--	50S ribosomal protein L13
ZMO_RS03955	1384.84	177.582	2.9632	0.00055451	0.0018135	--	MerC domain-containing protein
ZMO_RS03980	1055.38	396.596	1.412	1.0142e-08	9.5772e-08	--	ATP-dependent DNA helicase
ZMO_RS03990	309.104	473.704	-0.61589	0.016554	0.035546	--	NERD domain-containing protein
ZMO_RS03995	153.911	49.8158	1.6274	1.6299e-05	7.7012e-05	--	hypothetical protein
ZMO_RS04030	30142.3	6033.71	2.3207	0.0023616	0.0065866	--	2-isopropylmalate synthase
ZMO_RS04035	2328.13	949.893	1.2933	1.3831e-08	1.2341e-07	--	beta-galactosidase
ZMO_RS04040	4763.64	2059.57	1.2097	1.4186e-07	1.0225e-06	--	glucan biosynthesis protein D
ZMO_RS04055	2901.24	6789.43	-1.2266	3.0051e-08	2.4769e-07	--	LPS biosynthesis protein
ZMO_RS04070	3302.21	5634.88	-0.77095	0.00056017	0.0018288	--	sugar transporter
ZMO_RS04075	716.337	1586.38	-1.147	6.2517e-07	4.046e-06	--	DUF885 domain-containing protein
ZMO_RS04090	2517.96	569.487	2.1445	1.2445e-19	6.9317e-18	--	copper-translocating P-type ATPase
ZMO_RS04095	585.75	59.6864	3.2948	1.7745e-07	1.2496e-06	--	heavy metal transport/detoxification protein
ZMO_RS04105	5962.65	1046	2.5111	0.0013671	0.0040462	--	catalase
ZMO_RS04110	1796.28	4496.34	-1.3237	3.3487e-09	3.4578e-08	--	GGDEF domain-containing protein
ZMO_RS04115	926.799	345.866	1.422	1.9133e-08	1.6421e-07	--	hypothetical protein
ZMO_RS04120	1491.44	745.191	1.001	1.7287e-05	8.1057e-05	--	hypothetical protein
ZMO_RS04125	600.895	325.863	0.88285	0.00049893	0.0016523	--	ASCH domain-containing protein
ZMO_RS04135	11154.5	7031.84	0.66565	0.002092	0.0059221	--	protein translocase subunit SecA
ZMO_RS04150	744.233	439.971	0.75835	0.0015502	0.0045083	--	leucyl/phenylalanyl-tRNA--protein transferase
ZMO_RS04180	2439.37	1122.6	1.1197	0.00022382	0.00079881	--	glutathione S-transferase
ZMO_RS04210	422.398	180.213	1.2289	1.8099e-05	8.443e-05	--	NAD-dependent epimerase
ZMO_RS04220	1942.82	909.02	1.0958	1.5649e-06	9.5138e-06	--	sucrose-6-phosphate hydrolase
ZMO_RS04240	11417.1	32433.9	-1.5063	1.8114e-11	2.729e-10	--	trigger factor
ZMO_RS04245	886.016	3363.4	-1.9245	1.4879e-16	5.4695e-15	--	glycosyl transferase 2 protein
ZMO_RS04250	17329.8	5399.28	1.6824	3.461e-14	8.3701e-13	--	ATP-dependent Clp protease proteolytic subunit
ZMO_RS04255	31626.9	8957.58	1.82	1.2603e-06	7.7992e-06	--	ATP-dependent Clp protease ATP-binding subunit ClpX
ZMO_RS04315	1649.8	2877.08	-0.80232	0.00037889	0.0012802	--	hemolysin D
ZMO_RS04320	1506.33	2286.44	-0.60206	0.010414	0.023925	emrB	MFS transporter
ZMO_RS04325	251.401	454.306	-0.85367	0.00095369	0.0029166	--	nucleoside transporter
ZMO_RS04335	692.426	1281.56	-0.88817	0.00014816	0.00055802	--	NCS2 family permease
ZMO_RS04340	743.599	1210.34	-0.70282	0.0029264	0.0079686	--	purine nucleoside permease
ZMO_RS04350	3310.23	5804.74	-0.8103	0.00036784	0.001252	--	hopanoid biosynthesis associated glycosyl transferase HpnI
ZMO_RS04365	498.901	796.912	-0.67567	0.0042725	0.010937	--	membrane protein
ZMO_RS04375	5946.06	1526.36	1.9618	3.7556e-05	0.00016204	--	aldo/keto reductase
ZMO_RS04385	409.062	1230.36	-1.5887	0.0013217	0.0039181	--	TonB-dependent receptor
ZMO_RS04415	1035.2	1865.51	-0.84966	0.00077966	0.002458	--	5'-nucleotidase SurE
ZMO_RS04420	2751.16	5020.32	-0.86774	0.00018264	0.00066872	--	serine--tRNA ligase
ZMO_RS04435	69813.1	983.773	6.149	3.0669e-14	7.5574e-13	--	heat-shock protein IbpA
ZMO_RS04460	751.08	401.818	0.90242	0.00019888	0.00071956	--	peptide-methionine (S)-S-oxide reductase
ZMO_RS04470	3946.32	32716.6	-3.0514	1.9234e-38	4.4189e-36	--	5-methyltetrahydropteroyltriglutamate--homocysteine S-methyltransferase
ZMO_RS04500	966.684	1645.99	-0.76784	0.00079929	0.0025027	--	dihydropteroate synthase
ZMO_RS04510	1961.8	1118.83	0.81019	0.00037589	0.0012724	--	FAD-binding oxidoreductase
ZMO_RS04515	2333.67	6150.35	-1.3981	5.378e-10	6.4185e-09	--	multidrug transporter
ZMO_RS04520	929.053	379.007	1.2935	1.5326e-07	1.0961e-06	--	DUF4186 domain-containing protein
ZMO_RS04530	188.728	75.8623	1.3149	0.00013833	0.00052421	--	DNA gyrase inhibitor YacG
ZMO_RS04535	291.562	844.336	-1.534	6.1537e-10	7.1585e-09	--	hypothetical protein
ZMO_RS04540	626.571	1571.51	-1.3266	1.528e-08	1.3502e-07	--	septum formation inhibitor Maf
ZMO_RS04545	201.644	570.146	-1.4995	7.7224e-09	7.4313e-08	--	translation initiation factor IF-1
ZMO_RS04565	1973.65	3163.87	-0.68083	0.0043161	0.011003	--	ABC transporter permease
ZMO_RS04570	5504.44	20486	-1.896	8.6866e-17	3.3262e-15	--	deoxyhypusine synthase
ZMO_RS04575	4453.08	17509.3	-1.9752	8.1946e-19	4.0707e-17	--	type III PLP-dependent enzyme
ZMO_RS04580	4667.09	2654.41	0.81413	0.00021461	0.0007689	--	alpha/beta hydrolase
ZMO_RS04590	1638.63	1066.73	0.61929	0.014361	0.031575	--	7-cyano-7-deazaguanine synthase
ZMO_RS04595	11889.9	19713.7	-0.72946	0.00080996	0.0025232	--	ribonucleoside triphosphate reductase
ZMO_RS04605	1335.15	2641.42	-0.98431	0.00016515	0.00061198	--	anaerobic ribonucleoside-triphosphate reductase activating protein
ZMO_RS04610	1913.54	3456.25	-0.85296	0.00021106	0.00075916	--	ABC transporter ATP-binding protein
ZMO_RS04615	837.175	1919.11	-1.1968	1.1367e-07	8.357e-07	--	ABC transporter permease
ZMO_RS04625	11533.9	3119.32	1.8866	1.7736e-17	7.581e-16	--	class I SAM-dependent methyltransferase
ZMO_RS04630	29685.4	3409.17	3.1223	1.4783e-41	4.5286e-39	--	calcium-binding protein
ZMO_RS04635	3573.5	7973.11	-1.1578	3.8152e-07	2.5593e-06	--	argininosuccinate synthase
ZMO_RS04645	10747.6	15809.1	-0.55673	0.015544	0.03385	--	ribonucleotide-diphosphate reductase subunit alpha
ZMO_RS04650	880.51	312.175	1.496	0.00014001	0.00052948	--	TonB-dependent receptor
ZMO_RS04660	831.408	363.844	1.1922	1.9732e-06	1.1624e-05	--	NUDIX hydrolase
ZMO_RS04665	1024.01	437.056	1.2283	4.5727e-07	3.0452e-06	--	TPM domain-containing protein
ZMO_RS04670	2232.7	1188.44	0.90973	6.1114e-05	0.00025129	--	LemA family protein
ZMO_RS04675	764.936	2228.27	-1.5425	1.0676e-10	1.4015e-09	--	large conductance mechanosensitive channel protein MscL
ZMO_RS04690	2982.55	1498.74	0.99279	6.9881e-06	3.5777e-05	--	phosphate ABC transporter substrate-binding protein PstS
ZMO_RS04710	11810.7	6483.42	0.86527	0.00015972	0.00059308	--	phosphoribosylaminoimidazolesuccinocarboxamide synthase
ZMO_RS04725	1031.88	1899.22	-0.88013	0.00015727	0.00058514	--	CCA tRNA nucleotidyltransferase
ZMO_RS04735	895.558	1596.91	-0.83443	0.00071023	0.0022663	--	dihydroneopterin aldolase
ZMO_RS04740	28852.3	3413.54	3.0793	8.3936e-28	8.1197e-26	--	superoxide dismutase
ZMO_RS04745	290.929	122.754	1.2449	0.020821	0.043341	--	phage shock protein operon transcriptional activator
ZMO_RS04755	1777.91	264.821	2.7471	4.266e-08	3.3797e-07	--	phage shock protein PspA
ZMO_RS04765	546.781	73.5693	2.8938	0.00086536	0.0026867	--	envelope stress response membrane protein PspC
ZMO_RS04770	309.791	83.2935	1.895	0.000692	0.002212	--	hypothetical protein
ZMO_RS04810	4254.26	7171.91	-0.75345	0.00062715	0.0020223	--	30S ribosomal protein S16
ZMO_RS04815	961.065	2181.08	-1.1823	1.3906e-07	1.0102e-06	--	ribosome maturation factor RimM
ZMO_RS04820	3695.63	5652.74	-0.61313	0.0040405	0.010445	--	tRNA (guanosine(37)-N1)-methyltransferase TrmD
ZMO_RS04840	438.484	640.694	-0.54711	0.021109	0.043698	--	cellulose synthase catalytic subunit (UDP-forming)
ZMO_RS04845	443.417	740.422	-0.73968	0.0021376	0.006026	--	cellulose biosynthesis cyclic di-GMP-binding regulatory protein BcsB
ZMO_RS04850	3239.58	2244.35	0.52951	0.014071	0.031048	--	cellulose synthase operon C domain-containing protein
ZMO_RS04860	1588.64	707.925	1.1661	5.8121e-07	3.7882e-06	--	lytic murein transglycosylase
ZMO_RS04865	717.454	244.72	1.5518	2.1508e-09	2.3118e-08	--	septal ring lytic transglycosylase RlpA family protein
ZMO_RS04910	9250.08	2367.64	1.966	9.2213e-09	8.7818e-08	--	thioredoxin
ZMO_RS04930	538.969	348.722	0.62813	0.011023	0.024983	--	tRNA (adenosine(37)-N6)-threonylcarbamoyltransferase complex ATPase subunit type 1 TsaE
ZMO_RS04935	1210.94	809.387	0.58122	0.012736	0.028512	--	two-component sensor histidine kinase
ZMO_RS04945	2193.05	1246.6	0.81494	0.00014971	0.0005627	--	sensor histidine kinase
ZMO_RS04950	8060.07	15270.3	-0.92187	0.0025191	0.0069739	--	Lrp/AsnC family transcriptional regulator
ZMO_RS04960	558.357	1131.36	-1.0188	1.7168e-05	8.0704e-05	--	MFS transporter
ZMO_RS04970	10716.4	3992.45	1.4245	5.1011e-11	7.1029e-10	--	NAD(P)/FAD-dependent oxidoreductase
ZMO_RS04990	3046.82	855.789	1.832	5.9182e-11	7.9982e-10	--	dihydropyrimidine dehydrogenase subunit A
ZMO_RS04995	7094.89	3159.52	1.1671	0.024129	0.049114	--	glutamate synthase large subunit
ZMO_RS05005	761.621	396.595	0.94141	0.00011694	0.00044686	--	MerR family transcriptional regulator
ZMO_RS05010	1511.76	800.267	0.91767	6.1354e-05	0.00025172	--	integration host factor subunit alpha
ZMO_RS05035	2560.13	1622.4	0.65809	0.01061	0.024344	--	tRNA dihydrouridine synthase DusB
ZMO_RS05045	2904.99	1057.57	1.4578	1.5893e-10	2.0145e-09	--	hypothetical protein
ZMO_RS05050	6377.65	2577.64	1.307	2.79e-09	2.9303e-08	--	CinA family protein
ZMO_RS05065	2333.66	767.283	1.6048	0.0022842	0.0063902	--	carbonic anhydrase
ZMO_RS05070	744.951	407.152	0.87158	0.0034844	0.0091884	--	hypothetical protein
ZMO_RS05080	5074.46	3616.02	0.48885	0.02076	0.043261	--	cytochrome b6
ZMO_RS05095	8197.41	5525.81	0.56898	0.01329	0.029609	--	acetolactate synthase%2C large subunit%2C biosynthetic type
ZMO_RS05105	9871.38	18037.2	-0.86965	0.0064167	0.015704	--	ketol-acid reductoisomerase
ZMO_RS05115	247.372	408.41	-0.72334	0.0058218	0.014382	--	CatA-like O-acetyltransferase
ZMO_RS05120	99.716	249.585	-1.3236	1.1588e-05	5.6198e-05	--	teicoplanin resistance protein VanZ
ZMO_RS05125	3484.15	12702.2	-1.8662	3.4884e-16	1.1873e-14	--	50S ribosomal protein L31
ZMO_RS05140	6257.1	9216.51	-0.55873	0.012881	0.028768	--	outer membrane protein assembly factor BamA
ZMO_RS05175	10016.4	17988.9	-0.84474	0.00012624	0.00048041	--	elongation factor Ts
ZMO_RS05185	525.078	66.0045	2.9919	6.3057e-05	0.00025698	--	hypothetical protein
ZMO_RS05190	1783.47	618.513	1.5278	1.7744e-08	1.5311e-07	--	aspartate/glutamate racemase family protein
ZMO_RS05195	991.766	1865.49	-0.91148	9.6816e-05	0.00037542	--	CDP-diacylglycerol--serine O-phosphatidyltransferase
ZMO_RS05220	344.99	212.869	0.69658	0.020938	0.043534	--	ComF family protein
ZMO_RS05225	6593.04	3310.93	0.99371	4.4166e-05	0.00018791	--	DNA recombination/repair protein RecA
ZMO_RS05235	671.673	453.363	0.56709	0.022367	0.046041	--	ATPase
ZMO_RS05240	568.109	298.966	0.92619	0.00028764	0.0010089	--	antibiotic biosynthesis monooxygenase
ZMO_RS05245	857.784	556.889	0.62323	0.010651	0.02438	--	beta-N-acetylhexosaminidase
ZMO_RS05250	2117.5	1100.53	0.94416	2.4999e-05	0.00011234	--	succinylarginine dihydrolase
ZMO_RS05255	1923.09	3712.83	-0.94909	1.9527e-05	9.0403e-05	--	translocation/assembly module TamB
ZMO_RS05270	2995.29	1320.44	1.1817	1.4477e-07	1.0394e-06	--	DNA-binding response regulator
ZMO_RS05275	1955.23	913.873	1.0973	1.1807e-06	7.4066e-06	--	phosphoribosyl-AMP cyclohydrolase
ZMO_RS05280	1852.6	1269.51	0.54527	0.012784	0.028586	--	RNA methyltransferase
ZMO_RS05285	4300.52	2148.18	1.0014	0.00015509	0.00057821	--	bifunctional ADP-dependent NAD(P)H-hydrate dehydratase/NAD(P)H-hydrate epimerase
ZMO_RS05315	9454.28	1577.9	2.583	2.924e-14	7.3622e-13	--	lytic transglycosylase domain-containing protein
ZMO_RS05320	1924.53	498.687	1.9483	2.9981e-16	1.0397e-14	--	formamidopyrimidine-DNA glycosylase
ZMO_RS05395	249.795	530.093	-1.0855	8.0504e-05	0.00031958	--	transcriptional regulator NrdR
ZMO_RS05400	488.825	1063.98	-1.1221	5.616e-06	2.9408e-05	--	rRNA methyltransferase
ZMO_RS05405	800.613	342.586	1.2246	6.6195e-07	4.2541e-06	--	hypothetical protein
ZMO_RS05415	657.936	285.054	1.2067	3.4049e-06	1.8794e-05	--	nitrilase
ZMO_RS05430	4765.26	9970.08	-1.0651	2.3233e-06	1.3428e-05	trkD	potassium transporter Kup
ZMO_RS05440	2012.28	1383.75	0.54025	0.016535	0.035545	--	glutathione-disulfide reductase
ZMO_RS05450	514.494	330.173	0.63993	0.015817	0.034201	--	hypothetical protein
ZMO_RS05505	12253.6	32397.8	-1.4027	5.7558e-10	6.7384e-09	--	30S ribosomal protein S6
ZMO_RS05510	250.161	750.945	-1.5858	8.8239e-10	1.0074e-08	--	30S ribosomal protein S18
ZMO_RS05515	9552.7	25330.4	-1.4069	4.7892e-10	5.8295e-09	--	50S ribosomal protein L9
ZMO_RS05525	1401.9	2523.62	-0.84812	0.00030493	0.0010555	--	GTP cyclohydrolase I FolE
ZMO_RS05530	1717.2	989.365	0.79548	0.00053317	0.0017468	--	single-stranded-DNA-specific exonuclease RecJ
ZMO_RS05540	853.174	573.652	0.57266	0.015836	0.034202	--	glycosyltransferase family 1 protein
ZMO_RS05555	4444.88	1555.98	1.5143	1.9107e-11	2.8552e-10	--	transcriptional repressor
ZMO_RS05560	53136	8502.65	2.6437	6.9016e-06	3.5433e-05	--	zinc-dependent alcohol dehydrogenase
ZMO_RS05585	387.28	1038.24	-1.4227	5.9552e-09	5.8222e-08	--	50S ribosomal protein L36
ZMO_RS05605	283.707	881.763	-1.636	8.7567e-11	1.1579e-09	--	DUF3617 domain-containing protein
ZMO_RS05610	286.082	481.552	-0.75126	0.0041196	0.010605	--	cytochrome c biosynthesis protein
ZMO_RS05625	557.069	844.631	-0.60046	0.015023	0.032872	--	heme lyase CcmF/NrfE family subunit
ZMO_RS05670	6880.85	10120.7	-0.55665	0.017367	0.037074	--	GMP synthase (glutamine-hydrolyzing)
ZMO_RS05675	1155.44	3404.86	-1.5592	1.5155e-11	2.3213e-10	--	hypothetical protein
ZMO_RS05680	520.93	816.207	-0.64785	0.011238	0.025407	--	acyl carrier protein
ZMO_RS05685	3516.42	5874.7	-0.74041	0.0014431	0.0042371	--	aminotransferase class V-fold PLP-dependent enzyme
ZMO_RS05690	3602.01	891.994	2.0137	2.6557e-18	1.1905e-16	--	uroporphyrinogen-III C-methyltransferase
ZMO_RS05715	8.49285	32.8354	-1.9509	0.0051396	0.01287	--	hypothetical protein
ZMO_RS05720	792.548	1633.81	-1.0437	4.87e-05	0.00020436	--	endolytic transglycosylase MltG
ZMO_RS05725	8608.88	16496	-0.93822	2.0112e-05	9.2647e-05	--	beta-ketoacyl-[acyl-carrier-protein] synthase II
ZMO_RS05730	7370.79	14790.4	-1.0048	5.9601e-06	3.0945e-05	--	acyl carrier protein
ZMO_RS05755	3587.42	5600.44	-0.64259	0.0033548	0.0089106	--	glycosyl transferase group 1 protein
ZMO_RS05785	9447.8	5879.28	0.68434	0.0014533	0.0042602	--	hypothetical protein
ZMO_RS05790	4198.31	2434.47	0.7862	0.00029334	0.001025	--	ComF family protein
ZMO_RS05805	415.438	221.319	0.9085	0.001654	0.0047724	--	TonB-dependent receptor
ZMO_RS05815	2757.99	4205.2	-0.60856	0.0095243	0.022187	--	capsular polysaccharide biosynthesis protein
ZMO_RS05820	1213.43	1780.58	-0.55326	0.021112	0.043698	--	hypothetical protein
ZMO_RS05830	684.853	446	0.61875	0.011588	0.026166	--	lipoate--protein ligase B
ZMO_RS05835	4453.2	1538.89	1.533	8.6081e-12	1.3523e-10	--	pyrroline-5-carboxylate reductase
ZMO_RS05840	2828.63	1305.2	1.1158	1.3057e-06	8.0527e-06	--	hypothetical protein
ZMO_RS05845	1404.11	758.172	0.88906	9.4098e-05	0.00036642	--	hypothetical protein
ZMO_RS05855	925.663	2103.2	-1.184	3.8793e-07	2.5928e-06	--	fumarate hydratase
ZMO_RS05865	4942.07	3051.71	0.6955	0.0014012	0.0041272	--	leucyl aminopeptidase
ZMO_RS05870	1913.75	3745.88	-0.9689	1.0351e-05	5.1279e-05	--	LPS-assembly protein LptD
ZMO_RS05875	8484.58	4570.65	0.89244	7.2962e-05	0.00029027	--	peptidyl-prolyl cis-trans isomerase
ZMO_RS05895	490.535	1069.71	-1.1248	2.7413e-06	1.5599e-05	--	polysaccharide biosynthesis protein
ZMO_RS05900	433.269	1112.62	-1.3606	1.0706e-08	1.0039e-07	--	hypothetical protein
ZMO_RS05905	1130.88	2032.61	-0.84589	0.00020538	0.00074016	--	nucleoside triphosphate hydrolase
ZMO_RS05915	644.942	1942.69	-1.5908	1.0965e-11	1.6935e-10	--	RNA methyltransferase
ZMO_RS05920	8196.54	16178.5	-0.98099	1.0907e-05	5.3457e-05	--	IMP dehydrogenase
ZMO_RS05935	166.462	343.59	-1.0455	0.00016881	0.00062055	--	phosphotransferase
ZMO_RS05940	1669.34	901.648	0.88864	0.0011889	0.0035822	--	RNase adaptor protein RapZ
ZMO_RS05945	642.297	374.689	0.77755	0.0023989	0.0066704	--	PTS fructose transporter subunit IIA
ZMO_RS05975	8087.78	2795.21	1.5328	0.0002274	0.00080843	--	NAD(P)H:quinone oxidoreductase
ZMO_RS05985	440.702	261.163	0.75485	0.0034431	0.0091186	--	hypothetical protein
ZMO_RS05990	300.102	133.355	1.1702	8.1314e-05	0.0003221	--	LysE family translocator
ZMO_RS05995	613.563	96.4748	2.669	5.6645e-21	3.5901e-19	--	MFS transporter
ZMO_RS06000	1519.09	563.907	1.4297	1.2999e-08	1.1887e-07	--	zinc metalloprotease
ZMO_RS06010	5790.58	465.032	3.6383	3.6497e-08	2.9293e-07	--	aldo/keto reductase
ZMO_RS06015	2394.56	5867.12	-1.2929	1.2482e-08	1.1471e-07	--	aminopeptidase N
ZMO_RS06020	1303.15	2391.85	-0.87612	0.00023529	0.00083328	--	EamA/RhaT family transporter
ZMO_RS06025	4690.19	7400.74	-0.65802	0.0087412	0.020545	--	low specificity L-threonine aldolase
ZMO_RS06035	1652.48	955.179	0.79079	0.00051618	0.0017003	--	competence/damage-inducible protein A
ZMO_RS06045	24186.5	4701.88	2.3629	1.1328e-25	9.464e-24	--	BAX inhibitor (BI)-1/YccA family protein
ZMO_RS06055	33109.6	100282	-1.5987	1.7742e-12	3.1356e-11	--	flagellar motor protein MotB
ZMO_RS06060	1868.79	2678.32	-0.51922	0.018018	0.038197	--	ABC transporter ATP-binding protein
ZMO_RS06070	255.314	470.102	-0.8807	0.02269	0.04665	--	hypothetical protein
ZMO_RS06075	13106.7	23130.9	-0.81952	0.00021744	0.00077756	--	30S ribosomal protein S20
ZMO_RS06085	296.248	793.968	-1.4223	2.7876e-08	2.3184e-07	--	hypothetical protein
ZMO_RS06090	6195.54	19891.6	-1.6829	5.5895e-13	1.1047e-11	--	hypothetical protein
ZMO_RS06110	15625.6	31152.7	-0.99545	8.1306e-06	4.0943e-05	--	30S ribosomal protein S4
ZMO_RS06115	1382.41	2041.88	-0.56271	0.014001	0.030966	--	agmatine deiminase family protein
ZMO_RS06130	483.657	124.836	1.954	8.9313e-06	4.4729e-05	--	short-chain dehydrogenase
ZMO_RS06135	21263.9	1517.79	3.8084	4.7991e-06	2.5493e-05	--	hypothetical protein
ZMO_RS06160	75.7099	34.3568	1.1399	0.020344	0.04254	--	ethanolamine permease
ZMO_RS06165	331.267	55.9386	2.5661	3.0861e-06	1.7294e-05	--	AraC family transcriptional regulator
ZMO_RS06175	152.202	78.9742	0.94654	0.0087117	0.020502	--	aspartate aminotransferase family protein
ZMO_RS06180	1782.89	3779.99	-1.0842	2.2785e-06	1.3253e-05	--	GTPase Era
ZMO_RS06190	1047.93	578.904	0.85615	0.00038996	0.0013103	--	hypothetical protein
ZMO_RS06195	5076.43	1874.48	1.4373	1.1182e-10	1.4577e-09	--	DNA-binding response regulator
ZMO_RS06215	871.431	2502.07	-1.5217	1.508e-08	1.339e-07	--	diacylglycerol kinase
ZMO_RS06220	913.774	2171.04	-1.2485	6.7274e-05	0.0002719	--	DUF2141 domain-containing protein
ZMO_RS06235	1001.7	638.014	0.65079	0.0096388	0.022425	--	N-formylglutamate amidohydrolase
ZMO_RS06240	12142.5	6753.45	0.84637	6.6259e-05	0.00026943	--	hypothetical protein
ZMO_RS06245	556.921	249.517	1.1583	1.1767e-05	5.6767e-05	--	hypothetical protein
ZMO_RS06255	784.637	1787.08	-1.1875	4.7431e-07	3.1472e-06	--	hypothetical protein
ZMO_RS06260	2695.91	709.75	1.9254	9.0508e-17	3.395e-15	--	exodeoxyribonuclease III
ZMO_RS06265	1925.47	442.557	2.1213	1.3021e-13	2.8491e-12	--	iron-sulfur cluster assembly accessory protein
ZMO_RS06270	4381.54	1453.68	1.5917	8.5032e-06	4.2702e-05	--	M23 family peptidase
ZMO_RS06280	7129.09	4830.22	0.56163	0.0074496	0.017922	--	two-component response regulator
ZMO_RS06300	3239.12	1907.08	0.76423	0.0004598	0.0015282	--	inositol monophosphatase
ZMO_RS06305	144.876	78.9074	0.87658	0.013578	0.030141	--	(2Fe-2S)-binding protein
ZMO_RS06310	7124.77	1211.9	2.5556	0.00028403	0.00099818	--	bacterioferritin
ZMO_RS06320	5562.86	12188.8	-1.1317	5.3502e-07	3.5246e-06	--	MucR family transcriptional regulator
ZMO_RS06325	581.189	202.956	1.5178	2.4248e-08	2.0351e-07	--	ribosomal-protein-alanine N-acetyltransferase
ZMO_RS06330	1881.53	579.266	1.6996	3.5401e-10	4.3964e-09	--	tRNA (adenosine(37)-N6)-threonylcarbamoyltransferase complex dimerization subunit type 1 TsaB
ZMO_RS06335	2949.24	946.033	1.6404	6.7992e-13	1.3018e-11	--	NifU family protein
ZMO_RS06345	9762.05	43199.6	-2.1458	9.9616e-22	6.5391e-20	--	ATP-dependent helicase
ZMO_RS06350	962.076	452.299	1.0889	7.5966e-06	3.8464e-05	--	4-hydroxybenzoate octaprenyltransferase
ZMO_RS06355	746.957	1371.25	-0.8764	0.00023722	0.00083848	--	5-(carboxyamino)imidazole ribonucleotide mutase
ZMO_RS06360	1983.49	3210.92	-0.69494	0.0030025	0.0081275	--	5-(carboxyamino)imidazole ribonucleotide synthase
ZMO_RS06375	101238	4507.47	4.4893	2.5234e-74	4.638e-71	--	ATP-dependent chaperone ClpB
ZMO_RS06385	1504.61	409.065	1.879	2.2057e-14	5.6305e-13	--	DNA repair protein RadC
ZMO_RS06395	3079.36	5146.01	-0.74083	0.0052821	0.013191	--	TolC family protein
ZMO_RS06415	380.541	635.927	-0.74081	0.0043674	0.011118	--	DNA polymerase III subunit delta
ZMO_RS06420	761.815	1689.63	-1.1492	1.5684e-06	9.5138e-06	--	hypothetical protein
ZMO_RS06425	6541.37	10507.7	-0.68378	0.0026071	0.0072059	--	leucine--tRNA ligase
ZMO_RS06435	1060.65	439.649	1.2705	0.0033318	0.008875	--	LysE family translocator
ZMO_RS06440	331.354	205.155	0.69166	0.015332	0.033468	--	Lrp/AsnC family transcriptional regulator
ZMO_RS06455	1229.71	2455.73	-0.99784	3.5009e-05	0.00015369	--	FAD-binding oxidoreductase
ZMO_RS06470	3607.37	7634.66	-1.0816	2.3639e-06	1.3578e-05	--	glycine--tRNA ligase subunit beta
ZMO_RS06475	2341.09	3956.7	-0.75712	0.001141	0.0034494	--	glycine--tRNA ligase subunit alpha
ZMO_RS06480	381.118	221.726	0.78146	0.004249	0.010892	--	TraB/GumN family protein
ZMO_RS06495	1545.65	186.727	3.0492	1.4102e-09	1.5428e-08	--	mannitol dehydrogenase family protein
ZMO_RS06500	1272.51	683.89	0.89584	0.00015319	0.00057229	--	deoxyribodipyrimidine photo-lyase
ZMO_RS06505	620.743	1931.97	-1.638	4.1656e-12	6.6578e-11	--	purine nucleoside permease
ZMO_RS06510	1005.88	2075.99	-1.0453	4.2057e-06	2.2736e-05	--	MFS transporter
ZMO_RS06525	816.744	4735.78	-2.5356	0.00094088	0.0028919	--	MFS transporter
ZMO_RS06530	642.621	1739.65	-1.4368	0.0055557	0.013799	--	hypothetical protein
ZMO_RS06540	1331.99	606.862	1.1341	1.0115e-06	6.402e-06	--	sulfurtransferase
ZMO_RS06555	650.547	268.35	1.2775	0.00076278	0.0024172	--	TonB-dependent receptor
ZMO_RS06560	192.863	62.8	1.6187	3.6577e-06	2.0128e-05	--	hypothetical protein
ZMO_RS06565	388.637	1783.72	-2.1984	2.2164e-19	1.1982e-17	--	membrane protein
ZMO_RS06570	3914.95	1093.22	1.8404	7.3256e-15	1.9801e-13	--	alpha/beta hydrolase
ZMO_RS06580	4202.81	7692.17	-0.87204	0.0029502	0.0080095	--	hypothetical protein
ZMO_RS06590	19945.8	32441	-0.70174	0.0017461	0.0050068	--	translational GTPase TypA
ZMO_RS06595	1218.08	712.997	0.77264	0.015685	0.034074	--	hypothetical protein
ZMO_RS06620	3969.69	2774.56	0.51677	0.018542	0.039264	--	electron transfer flavoprotein subunit alpha
ZMO_RS06625	3248.97	1909.47	0.76681	0.00058546	0.0018965	--	electron transfer flavoprotein subunit beta/FixA family protein
ZMO_RS06635	872.997	460.564	0.92257	0.00020055	0.00072419	--	autotransporter domain-containing protein
ZMO_RS06645	1656.81	875.907	0.91956	0.00011575	0.00044324	--	helicase UvrD
ZMO_RS06650	2995.93	342.153	3.1303	2.5789e-37	4.7399e-35	--	HD domain-containing protein
ZMO_RS06665	5047.95	3213.75	0.65144	0.002069	0.0058779	--	3-deoxy-8-phosphooctulonate synthase
ZMO_RS06670	1611.85	1134.5	0.50666	0.021073	0.043698	--	3-deoxy-manno-octulosonate cytidylyltransferase
ZMO_RS06675	18128.7	31180.5	-0.78237	0.0046067	0.011679	--	membrane protein
ZMO_RS06680	19571.9	37957.1	-0.95558	2.3521e-05	0.00010622	--	porin family protein
ZMO_RS06700	1426.07	568.97	1.3256	0.00029416	0.0010259	--	ATP:cob(I)alamin adenosyltransferase
ZMO_RS06715	434.468	1515.16	-1.8022	5.4994e-08	4.283e-07	--	histidine triad nucleotide-binding protein
ZMO_RS06725	834.097	1527.53	-0.87291	0.0022276	0.0062425	--	imidazole glycerol phosphate synthase cyclase subunit
ZMO_RS06730	1092.9	1876.96	-0.78023	0.0080959	0.01925	--	1-(5-phosphoribosyl)-5-((5-phosphoribosylamino)methylideneamino)imidazole-4-carboxamide isomerase
ZMO_RS06735	922.06	1613.61	-0.80736	0.0010029	0.0030369	--	imidazole glycerol phosphate synthase subunit HisH
ZMO_RS06755	1623.56	951.122	0.77146	0.00072708	0.0023161	--	hypothetical protein
ZMO_RS06760	1878.16	6024.3	-1.6815	3.7819e-13	7.6387e-12	--	inorganic diphosphatase
ZMO_RS06765	2498.55	4011.28	-0.68297	0.0024559	0.0068187	--	histidine--tRNA ligase
ZMO_RS06770	1860.03	3295.55	-0.82519	0.00023495	0.00083328	--	peptide chain release factor 1
ZMO_RS06775	639.666	1371.26	-1.1001	4.0492e-06	2.2019e-05	--	peptide chain release factor N(5)-glutamine methyltransferase
ZMO_RS06790	6543.65	12836.2	-0.97205	1.4713e-05	7.0241e-05	--	phenylalanine--tRNA ligase subunit beta
ZMO_RS06795	3829.27	7224.57	-0.91584	4.622e-05	0.00019529	--	phenylalanine--tRNA ligase subunit alpha
ZMO_RS06800	5808.02	17410.3	-1.5838	2.2591e-12	3.9173e-11	--	50S ribosomal protein L20
ZMO_RS06805	1347.63	4423.63	-1.7148	1.0752e-05	5.2986e-05	--	histidinol phosphate phosphatase
ZMO_RS06810	5114.96	12812.3	-1.3247	4.7048e-09	4.7514e-08	--	ribose-phosphate pyrophosphokinase
ZMO_RS06815	1410.82	2081.63	-0.56118	0.022739	0.046697	--	DUF2093 domain-containing protein
ZMO_RS06835	596.223	1580.89	-1.4068	2.653e-09	2.8025e-08	--	RND transporter
ZMO_RS06840	717.853	1583.71	-1.1416	1.31e-06	8.0527e-06	--	nodulation protein
ZMO_RS06845	871.59	1805.08	-1.0503	6.239e-06	3.2212e-05	--	acriflavin resistance protein
ZMO_RS06850	845.479	1282.91	-0.60158	0.0073138	0.017641	--	efflux RND transporter periplasmic adaptor subunit
ZMO_RS06855	3584.15	2309.21	0.63423	0.0034916	0.0091943	--	KpsF/GutQ family sugar-phosphate isomerase
ZMO_RS06860	764.711	1266.9	-0.72831	0.0013902	0.0041016	--	phosphoribosylformylglycinamidine synthase subunit PurS
ZMO_RS06865	3053.64	4959.51	-0.69967	0.0020691	0.0058779	--	phosphoribosylformylglycinamidine synthase subunit PurQ
ZMO_RS06870	2870.14	462.679	2.633	2.7595e-07	1.8884e-06	--	hypothetical protein
ZMO_RS06890	243.196	443.334	-0.86628	0.0025194	0.0069739	--	ferrous iron transport protein A
ZMO_RS06905	4566.92	2004.83	1.1877	9.2121e-08	6.8829e-07	--	cobaltochelatase subunit CobT
ZMO_RS06910	3477.26	1523.79	1.1903	9.3732e-08	6.9749e-07	--	cobaltochelatase subunit CobS
ZMO_RS06915	2073.95	781.397	1.4083	1.3755e-09	1.5139e-08	--	J domain-containing protein
ZMO_RS06925	2097.9	3110.87	-0.56837	0.014416	0.031656	--	squalene--hopene cyclase
ZMO_RS06930	1239.66	357.477	1.794	1.9055e-13	3.98e-12	--	BolA family transcriptional regulator
ZMO_RS06955	715.246	1079.54	-0.59391	0.0084749	0.020073	--	16S rRNA (uracil(1498)-N(3))-methyltransferase
ZMO_RS06965	25965.8	11544.8	1.1694	5.2724e-08	4.1237e-07	--	amidophosphoribosyltransferase
ZMO_RS06970	547.48	833.653	-0.60664	0.016233	0.034977	--	NAD(P)-dependent oxidoreductase
ZMO_RS06975	524.237	1385.41	-1.402	1.3613e-08	1.2265e-07	--	RNA pyrophosphohydrolase
ZMO_RS06980	442.793	1460.31	-1.7216	1.0443e-12	1.9388e-11	--	DUF481 domain-containing protein
ZMO_RS06995	781.976	259.416	1.5919	5.2823e-10	6.3457e-09	--	YnfA family protein
ZMO_RS07000	281.043	450.851	-0.68186	0.007294	0.017617	--	aminoglycoside phosphotransferase
ZMO_RS07010	2607.84	931.419	1.4854	2.2696e-10	2.8572e-09	--	pyruvate formate-lyase 1-activating enzyme
ZMO_RS07015	36746.3	9533.23	1.9466	2.5062e-12	4.2261e-11	--	formate C-acetyltransferase
ZMO_RS07025	5952.21	8785.71	-0.56173	0.013311	0.02962	--	cytochrome ubiquinol oxidase subunit I
ZMO_RS07045	427.474	244.35	0.80689	0.0026706	0.0073703	--	LysR family transcriptional regulator
ZMO_RS07050	3220.19	287.086	3.4876	8.3884e-08	6.371e-07	--	NAD(P)-dependent oxidoreductase
ZMO_RS07055	133.111	41.246	1.6903	2.2027e-05	0.00010046	--	MFS transporter
ZMO_RS07060	122.918	53.2063	1.208	0.0026932	0.0074102	--	3-oxoacyl-ACP reductase
ZMO_RS07065	428.944	267.029	0.68379	0.0097412	0.022606	--	alpha/beta hydrolase
ZMO_RS07100	6048.26	2939.45	1.041	2.2079e-06	1.2883e-05	--	antibiotic biosynthesis monooxygenase
ZMO_RS07115	309.65	169.05	0.87319	0.0028316	0.0077332	--	DNA replication and repair protein RecF
ZMO_RS07120	1862.31	752.479	1.3074	0.012528	0.028115	--	bacterioferritin
ZMO_RS07125	329.757	89.6983	1.8783	1.0221e-07	7.5753e-07	--	hypothetical protein
ZMO_RS07130	13306.9	778.269	4.0958	1.7846e-16	6.4315e-15	--	excinuclease ABC subunit A
ZMO_RS07135	2773.77	1563.26	0.82729	0.0045874	0.011646	--	toll/interleukin-1 receptor domain-containing protein
ZMO_RS07150	3831.44	2560.57	0.58142	0.015746	0.034088	--	alanine racemase
ZMO_RS07165	102111	63869.7	0.67694	0.0092257	0.021574	--	alcohol dehydrogenase
ZMO_RS07175	4267.66	7445.87	-0.80299	0.00032396	0.001113	--	hopanoid biosynthesis-associated RND transporter HpnN
ZMO_RS07180	1739.23	2992.46	-0.78288	0.0020735	0.0058814	--	homoserine kinase
ZMO_RS07185	182.872	425.957	-1.2199	1.769e-05	8.2733e-05	--	ribonuclease H
ZMO_RS07190	1418.2	916.456	0.62992	0.0061821	0.015211	--	peptidase
ZMO_RS07195	3272.25	727.223	2.1698	3.1284e-20	1.8548e-18	--	TIGR01244 family phosphatase
ZMO_RS07200	412.657	1231.02	-1.5768	3.8056e-11	5.3806e-10	--	alkaline phosphatase family protein
ZMO_RS07205	4651.47	7385.67	-0.66704	0.0038394	0.0099814	--	pyruvate dehydrogenase E1 component subunit beta
ZMO_RS07210	4643.61	6818.74	-0.55426	0.014773	0.032403	--	pyruvate dehydrogenase E1 component subunit alpha
ZMO_RS07255	16316.1	11014.8	0.56685	0.0082189	0.019517	--	carbamoyl phosphate synthase large subunit
ZMO_RS07260	7808.19	3859.3	1.0166	4.4454e-06	2.3961e-05	--	carbamoyl-phosphate synthase small subunit
ZMO_RS07265	2006.39	3172.09	-0.66083	0.0035129	0.009237	--	GatB/YqeY domain-containing protein
ZMO_RS07275	13802.2	8191.24	0.75274	0.0069331	0.016856	--	RNA polymerase sigma factor RpoD
ZMO_RS07290	4235.4	7965.05	-0.91118	4.0475e-05	0.00017301	--	membrane protein insertase YidC
ZMO_RS07320	1738.44	3133.64	-0.85004	0.00016824	0.00062055	--	succinyl-diaminopimelate desuccinylase
ZMO_RS07325	219.97	1373.22	-2.6422	2.7151e-25	2.1697e-23	--	hypothetical protein
ZMO_RS07335	2002.3	759.387	1.3988	0.0015902	0.0046115	--	transglycosylase
ZMO_RS07340	533.553	189.657	1.4922	3.2777e-06	1.8201e-05	--	hypothetical protein
ZMO_RS07345	13187.3	3563.83	1.8876	3.0916e-17	1.2627e-15	--	Tim44 domain-containing protein
ZMO_RS07400	203.149	694.908	-1.7743	5.7861e-12	9.168e-11	--	uracil-DNA glycosylase
ZMO_RS07410	537.73	815.376	-0.60058	0.015702	0.034074	--	serine hydrolase
ZMO_RS07415	2327.47	3762.23	-0.69282	0.0021813	0.0061397	--	phosphoenolpyruvate--protein phosphotransferase
ZMO_RS07420	3161.58	5222.58	-0.72412	0.0013794	0.004076	--	2-nitropropane dioxygenase
ZMO_RS07425	5254.41	8903.99	-0.76092	0.00088855	0.0027541	--	aspartate kinase
ZMO_RS07430	1423.9	585.98	1.2809	4.0554e-08	3.2268e-07	--	bifunctional 2-polyprenyl-6-hydroxyphenol methylase/3-demethylubiquinol 3-O-methyltransferase UbiG
ZMO_RS07455	27024.4	7608.17	1.8286	2.515e-16	8.8896e-15	--	ATP-dependent metalloprotease
ZMO_RS07465	3463.13	2253.87	0.61967	0.0050028	0.012562	--	gamma-glutamyl-phosphate reductase
ZMO_RS07480	1147.84	2482.11	-1.1126	4.9415e-07	3.2671e-06	--	23S rRNA (pseudouridine(1915)-N(3))-methyltransferase RlmH
ZMO_RS07495	1776.05	937.747	0.9214	4.9893e-05	0.00020842	--	disulfide bond formation protein B
ZMO_RS07515	347.396	526.698	-0.6004	0.00987	0.022819	--	hypothetical protein
ZMO_RS07525	4137.88	2364.74	0.80721	0.00014335	0.00054102	--	protein disulfide-isomerase
ZMO_RS07530	597.866	329.865	0.85795	0.004936	0.012411	--	DUF721 domain-containing protein
ZMO_RS07545	823.743	218.062	1.9175	1.7017e-13	3.6368e-12	--	LOG family protein
ZMO_RS07565	722.199	1049.1	-0.53869	0.023185	0.047508	ansB	asparaginase
ZMO_RS07570	3323.61	6379.76	-0.94075	3.5036e-05	0.00015369	--	phosphoserine transaminase
ZMO_RS07575	1891.76	6153.42	-1.7017	7.5832e-14	1.7207e-12	--	phosphoglycerate dehydrogenase
ZMO_RS07580	3829.14	7131.32	-0.89715	8.1977e-05	0.00032402	--	ATP phosphoribosyltransferase regulatory subunit
ZMO_RS07585	4021.55	9144.54	-1.1852	2.2429e-07	1.5734e-06	--	adenylosuccinate synthetase
ZMO_RS07590	2024.72	924.06	1.1317	3.0631e-06	1.727e-05	--	folate-binding protein
ZMO_RS07595	3526.47	1770.05	0.99443	4.9192e-06	2.6033e-05	--	dihydroorotase
ZMO_RS07600	6510.23	803.832	3.0177	3.5669e-25	2.7316e-23	--	molecular chaperone DnaJ
ZMO_RS07620	4279.89	13045.9	-1.608	1.7819e-06	1.0738e-05	--	TonB-dependent receptor
ZMO_RS07630	2037.13	183.976	3.469	1.0499e-41	3.8595e-39	--	zinc-binding alcohol dehydrogenase family protein
ZMO_RS07635	1126.11	99.4275	3.5016	9.5168e-38	1.9435e-35	--	transcriptional regulator
ZMO_RS07640	1836.89	678.048	1.4378	1.109e-09	1.2429e-08	--	GTP cyclohydrolase II
ZMO_RS07650	3367.4	1048.81	1.6829	1.3417e-13	2.9012e-12	--	hypothetical protein
ZMO_RS07665	2437.9	1308.17	0.89809	5.1418e-05	0.00021381	--	ubiquinone biosynthesis protein UbiH
ZMO_RS07670	4096.45	732.518	2.4834	5.63e-14	1.3099e-12	--	peptidase S16
ZMO_RS07675	9188.21	429.321	4.4197	7.8185e-70	7.1852e-67	--	thioredoxin
ZMO_RS07680	624.677	1220.3	-0.96605	7.191e-05	0.00028849	--	orotate phosphoribosyltransferase
ZMO_RS07690	177.598	391.181	-1.1392	5.6688e-05	0.00023414	--	holo-ACP synthase
ZMO_RS07695	2066.89	3260.06	-0.65744	0.0043133	0.011003	--	signal peptidase I
ZMO_RS07705	2540.2	4619.72	-0.86286	4.4713e-05	0.0001898	--	FKBP-type peptidyl-prolyl cis-trans isomerase
ZMO_RS07715	1146.81	3323.57	-1.5351	3.2032e-11	4.71e-10	--	biopolymer transporter ExbD
ZMO_RS07720	746.262	2147.47	-1.5249	1.3564e-10	1.7434e-09	--	biopolymer transporter ExbD
ZMO_RS07725	2235.34	5436.03	-1.2821	1.6601e-08	1.4393e-07	--	MotA/TolQ/ExbB proton channel family protein
ZMO_RS07730	2851.91	6792.15	-1.2519	3.0865e-08	2.5243e-07	--	energy transducer TonB
ZMO_RS07735	568.004	1401.45	-1.3029	8.8335e-08	6.627e-07	--	hypothetical protein
ZMO_RS07745	9593.58	4732.7	1.0194	0.0032896	0.0087754	--	DNA-directed RNA polymerase subunit omega
ZMO_RS07750	14324.7	2110.86	2.7626	2.7239e-33	3.8512e-31	--	VOC family protein
ZMO_RS07755	2414.59	1400.68	0.78565	0.00041112	0.0013764	--	S-(hydroxymethyl)glutathione dehydrogenase/class III alcohol dehydrogenase
ZMO_RS07775	1150.66	452.595	1.3462	1.6261e-08	1.4165e-07	--	ATP-dependent Clp protease adaptor ClpS
ZMO_RS07780	23293.7	8262.22	1.4953	3.6899e-12	5.9491e-11	--	pyridoxal phosphate-dependent aminotransferase
ZMO_RS07800	33045	11404.9	1.5348	8.215e-05	0.00032402	--	peroxiredoxin
ZMO_RS07815	939.997	510.599	0.88047	0.00040241	0.0013497	--	glycosyl transferase family 1
ZMO_RS07820	2137.33	924.176	1.2096	1.7492e-07	1.2365e-06	--	DNA-binding response regulator
ZMO_RS07830	2352.96	3669.61	-0.64115	0.0051796	0.012953	--	DUF3297 domain-containing protein
ZMO_RS07835	3554.36	5784.04	-0.70249	0.001264	0.0037594	--	elongation factor 4
ZMO_RS07840	1219.23	792.49	0.62151	0.018966	0.040068	--	biotin transporter BioY
ZMO_RS07845	1931.86	3548.37	-0.87716	0.00011372	0.00043635	--	methionine synthase
ZMO_RS07850	520.071	1161.32	-1.159	8.2109e-07	5.2402e-06	--	5-methyltetrahydrofolate--homocysteine methyltransferase
ZMO_RS07855	383.253	1126.96	-1.5561	1.4769e-10	1.8851e-09	--	methylenetetrahydrofolate reductase [NAD(P)H]
ZMO_RS07860	579.101	1476.72	-1.3505	1.1487e-08	1.061e-07	--	methyltransferase domain-containing protein
ZMO_RS07865	1166.75	2067.52	-0.8254	0.00016857	0.00062055	--	ABC transporter
ZMO_RS07870	614.214	371.021	0.72724	0.0036615	0.0095594	--	proteinase IV
ZMO_RS07885	9279.48	3442.38	1.4306	2.1655e-05	9.901e-05	--	ferredoxin--NADP reductase
ZMO_RS07890	5613.42	986.178	2.509	1.9746e-27	1.8147e-25	--	NAD-dependent succinate-semialdehyde dehydrogenase
ZMO_RS07900	2650.3	6741	-1.3468	3.3355e-09	3.4578e-08	--	2-keto-3-deoxygluconate permease
ZMO_RS07925	734.352	470.001	0.64381	0.0086622	0.020412	--	16S rRNA (cytidine(1402)-2'-O)-methyltransferase
ZMO_RS07935	1362.27	2830.43	-1.055	3.9356e-06	2.1465e-05	--	hypothetical protein
ZMO_RS07940	1700.96	3660.51	-1.1057	1.3254e-06	8.1201e-06	--	peptidoglycan-binding protein
ZMO_RS07945	917.617	594.534	0.62613	0.0089032	0.020899	--	zinc transporter ZntB
ZMO_RS07950	3146.16	2195.8	0.51884	0.017061	0.036463	--	UTP--glucose-1-phosphate uridylyltransferase
ZMO_RS07975	911.71	346.344	1.3964	3.7222e-07	2.506e-06	--	NAD(P)H quinone oxidoreductase
ZMO_RS07980	3004.69	968.929	1.6328	6.1065e-13	1.1815e-11	--	aldo/keto reductase
ZMO_RS07990	591.019	284.5	1.0548	3.8345e-05	0.00016467	--	hypothetical protein
ZMO_RS07995	11219	4402.55	1.3495	0.008563	0.02023	--	aminopeptidase N
ZMO_RS08005	464.579	814.153	-0.80938	0.00099104	0.0030108	--	DUF475 domain-containing protein
ZMO_RS08030	1448.52	2766.25	-0.93335	3.8205e-05	0.00016445	--	hypothetical protein
ZMO_RS08050	1495.32	898.125	0.73546	0.0058634	0.014466	--	hypothetical protein
ZMO_RS08065	186.698	95.8209	0.96229	0.0030939	0.0083504	--	LysR family transcriptional regulator
ZMO_RS08075	2561.26	6823.13	-1.4136	5.4477e-10	6.4185e-09	--	hypothetical protein
ZMO_RS08080	2713.28	4281.71	-0.65815	0.0042866	0.010958	--	3-phosphoshikimate 1-carboxyvinyltransferase
ZMO_RS08085	4785.35	7212.3	-0.59184	0.0085384	0.020198	--	(d)CMP kinase
ZMO_RS08090	54293.3	112010	-1.0448	2.7207e-06	1.553e-05	--	30S ribosomal protein S1
ZMO_RS08100	2223.17	1387.43	0.6802	0.0018564	0.0052901	--	integration host factor subunit beta
ZMO_RS08110	1730.22	1150.43	0.58878	0.0066864	0.016321	--	haloacid dehalogenase
ZMO_RS08115	389.216	115.077	1.758	2.9038e-09	3.0325e-08	--	sugar O-acetyltransferase
ZMO_RS08165	167.321	53.1747	1.6538	9.8122e-06	4.8743e-05	--	nif-specific transcriptional activator NifA
ZMO_RS08170	559.742	213.052	1.3936	0.0092956	0.021709	--	nitrogenase cofactor biosynthesis protein NifB
ZMO_RS08175	147.121	321.181	-1.1264	0.00058607	0.0018965	--	ferredoxin
ZMO_RS08190	263.398	160.981	0.71035	0.023791	0.048586	--	SIR2 family protein
ZMO_RS08200	163.799	35.0824	2.2231	1.3142e-08	1.1899e-07	--	nitrogenase iron protein
ZMO_RS08205	299.887	44.8854	2.7401	1.5755e-07	1.1224e-06	--	nitrogenase molybdenum-iron protein alpha chain
ZMO_RS08210	291.165	72.6447	2.0029	4.861e-10	5.878e-09	--	nitrogenase molybdenum-iron protein subunit beta
ZMO_RS08215	160.607	70.9669	1.1783	0.0032026	0.0085711	--	nitrogenase iron-molybdenum cofactor biosynthesis protein NifE
ZMO_RS08220	146.994	65.8259	1.159	0.0018287	0.0052191	--	nitrogenase iron-molybdenum cofactor biosynthesis protein NifN
ZMO_RS08245	40.1782	13.8458	1.537	0.015625	0.033987	--	iron-sulfur cluster assembly accessory protein
ZMO_RS08260	48.724	17.2628	1.497	0.016899	0.03616	--	homocitrate synthase
ZMO_RS08275	495.913	79.8756	2.6343	7.0248e-05	0.00028253	--	transporter
ZMO_RS08280	1147.18	272.009	2.0764	1.1238e-05	5.4935e-05	--	cysteine hydrolase
ZMO_RS08285	1442.47	437.115	1.7225	1.483e-12	2.6723e-11	--	sigma E positive regulator RseC/MucC
ZMO_RS08290	9086.96	3538.25	1.3608	2.6401e-07	1.8174e-06	--	FAD:protein FMN transferase
ZMO_RS08300	741.501	2242.39	-1.5965	1.989e-11	2.9483e-10	--	PhnA protein
ZMO_RS08310	70.9048	15.9605	2.1514	7.2451e-05	0.00028886	--	iron ABC transporter permease
ZMO_RS08315	319.268	89.5798	1.8335	5.034e-08	3.971e-07	--	ABC transporter substrate-binding protein
ZMO_RS08320	170.099	55.7357	1.6097	0.024297	0.049345	--	hypothetical protein
ZMO_RS08325	102.781	52.7043	0.96357	0.017563	0.037406	--	DUF2023 domain-containing protein
ZMO_RS08335	232.36	688.241	-1.5666	1.0344e-09	1.1664e-08	--	dihydrodipicolinate synthase family protein
ZMO_RS08340	774.682	344.44	1.1694	0.011018	0.024983	--	PLP-dependent aminotransferase family protein
ZMO_RS08345	155.344	829.133	-2.4161	7.3629e-20	4.2291e-18	--	GMP synthase
ZMO_RS08355	896.712	189.555	2.242	2.9747e-05	0.00013238	--	LysR family transcriptional regulator
ZMO_RS08395	2493.97	1103.8	1.176	2.2723e-07	1.588e-06	--	VIT family protein
ZMO_RS08400	2629.93	798.656	1.7194	1.0161e-08	9.5772e-08	--	nitronate monooxygenase
ZMO_RS08460	1619.6	880.781	0.87878	0.0050134	0.012571	--	biotin--[acetyl-CoA-carboxylase] ligase
ZMO_RS08465	999.31	670.491	0.57571	0.019577	0.041216	--	ribonuclease I
ZMO_RS08470	3335.88	2000.71	0.73756	0.021416	0.044277	--	nicotinate-nucleotide diphosphorylase (carboxylating)
ZMO_RS08475	5477.69	2893.96	0.92052	0.00038042	0.001283	--	quinolinate synthase NadA
ZMO_RS08480	3154.45	855.635	1.8823	1.9905e-06	1.1689e-05	--	DUF4230 domain-containing protein
ZMO_RS08485	4333.12	961.328	2.1723	7.4669e-21	4.5747e-19	--	monothiol glutaredoxin%2C Grx4 family
ZMO_RS08490	334.784	104.794	1.6757	6.1989e-08	4.7672e-07	--	BolA family transcriptional regulator
ZMO_RS08495	3012.41	952.211	1.6616	3.5909e-13	7.3333e-12	--	DUF1476 domain-containing protein
ZMO_RS08505	1822.97	1092.31	0.73891	0.0017349	0.0049825	--	glutamine cyclotransferase
ZMO_RS08510	4018.64	7442.47	-0.88907	0.00011047	0.0004248	--	valine--tRNA ligase
ZMO_RS08520	975.579	1432.45	-0.55416	0.01673	0.035839	--	hypothetical protein
ZMO_RS08530	409.592	715.746	-0.80526	0.00067963	0.0021762	--	ammonia monooxygenase
ZMO_RS08535	774.003	454.357	0.76851	0.0023816	0.0066324	--	glyoxylate/hydroxypyruvate reductase A
ZMO_RS08540	1263.69	608.764	1.0537	7.8652e-06	3.9715e-05	--	hypothetical protein
ZMO_RS08545	13570.4	1804.62	2.9107	6.3794e-09	6.2038e-08	--	alkene reductase
ZMO_RS08565	614.512	1095.95	-0.83467	0.00057779	0.0018796	--	SAM-dependent methyltransferase
ZMO_RS08570	1245.72	2087.81	-0.74502	0.0017787	0.0050922	--	insulinase family protein
ZMO_RS08590	1288.27	2563.01	-0.99241	2.6968e-05	0.00012031	--	adenosine kinase
ZMO_RS08595	2617.56	4066.31	-0.6355	0.0046552	0.011769	--	protein translocase subunit SecF
ZMO_RS08600	3593.72	6211.09	-0.78937	0.00045468	0.001514	--	protein translocase subunit SecD
ZMO_RS08605	916.095	2257.64	-1.3012	2.6665e-08	2.2277e-07	--	preprotein translocase subunit YajC
ZMO_RS08615	2728.56	4534.66	-0.73286	0.0011985	0.0036049	--	ketoacyl-ACP synthase III
ZMO_RS08620	6921.58	15431.3	-1.1567	1.6231e-07	1.1518e-06	--	phosphate acyltransferase
ZMO_RS08625	1383.26	2168.84	-0.64885	0.0044432	0.011295	--	hypothetical protein
ZMO_RS08640	1452.21	2164.28	-0.57564	0.017787	0.037794	--	tRNA (adenosine(37)-N6)-threonylcarbamoyltransferase complex transferase subunit TsaD
ZMO_RS08650	8194.47	19310	-1.2366	1.9763e-08	1.6817e-07	--	translation initiation factor IF-3
ZMO_RS08655	10797.1	7059.33	0.61305	0.0040165	0.010398	--	DNA mismatch repair protein MutS
ZMO_RS08660	4742.88	3342.8	0.5047	0.022369	0.046041	--	outer membrane protein assembly factor BamE
ZMO_RS08665	2782.95	1427.13	0.9635	2.2786e-05	0.00010341	--	DUF177 domain-containing protein
ZMO_RS08670	10104	21555	-1.0931	1.2155e-06	7.5477e-06	--	50S ribosomal protein L25
ZMO_RS08675	1234.74	2158.46	-0.80579	0.00050744	0.0016745	--	peptidyl-tRNA hydrolase
ZMO_RS08710	1726.93	683.334	1.3375	1.8493e-05	8.6053e-05	--	adenosylmethionine--8-amino-7-oxononanoate transaminase
ZMO_RS08720	3497.94	964.179	1.8591	3.428e-05	0.00015146	--	hypothetical protein
ZMO_RS08725	1624.69	821.153	0.98444	3.7174e-05	0.00016114	--	primosomal protein N'
ZMO_RS08730	2543.84	5308.3	-1.0612	3.34e-06	1.8491e-05	--	capsular polysaccharide biosynthesis protein
ZMO_RS08735	1000.15	1684.71	-0.75229	0.00165	0.0047685	--	LTA synthase family protein
ZMO_RS08755	21302.9	1359.71	3.9697	9.4412e-10	1.0712e-08	--	molecular chaperone GroES
ZMO_RS08760	126127	12497.1	3.3352	5.9879e-06	3.1002e-05	--	molecular chaperone GroEL
ZMO_RS08780	73.4149	151.008	-1.0405	0.0017037	0.0049004	--	DNA repair protein RadC
ZMO_RS08785	437.405	1196.2	-1.4514	1.1774e-09	1.3115e-08	--	hypothetical protein
ZMO_RS08790	978.837	2327.57	-1.2497	2.2991e-08	1.9474e-07	--	hypothetical protein
ZMO_RS08855	4058.36	468.605	3.1145	0.00018095	0.00066383	--	PLP-dependent aminotransferase family protein
ZMO_RS08860	583.74	46.2486	3.6578	5.4439e-10	6.4185e-09	--	PhzF family phenazine biosynthesis protein
ZMO_RS08865	247.297	38.353	2.6888	0.00074626	0.002369	--	KR domain-containing protein
ZMO_RS08870	72.4292	15.3937	2.2342	0.0056005	0.013892	--	RidA family protein
ZMO_RS08875	117.596	29.9296	1.9742	0.016638	0.035683	--	YbaK/EbsC family protein
ZMO_RS08880	167.784	37.5218	2.1608	1.2215e-05	5.8773e-05	--	flavodoxin family protein
ZMO_RS08885	223.429	92.061	1.2792	0.0027436	0.0075265	--	pyridoxal phosphate-dependent aminotransferase
ZMO_RS08890	80.0235	38.0104	1.074	0.018812	0.039788	--	PaaI family thioesterase
ZMO_RS08950	1423.62	898.405	0.66412	0.0034668	0.0091602	--	hypothetical protein
ZMO_RS08960	1742.84	1132.05	0.6225	0.0070439	0.017103	--	sensor histidine kinase
ZMO_RS08985	403.517	599.838	-0.57195	0.019626	0.041226	--	class A beta-lactamase
ZMO_RS08995	1447.88	717.057	1.0138	0.0035868	0.0093776	--	3-methyl-2-oxobutanoate hydroxymethyltransferase
ZMO_RS09000	2154.53	1076.19	1.0014	0.00057175	0.0018633	--	pantoate--beta-alanine ligase
ZMO_RS09010	268.773	146.328	0.87718	0.002843	0.0077528	--	ArgP/LysG family DNA-binding transcriptional regulator
ZMO_RS09020	365.394	847.428	-1.2136	1.8693e-06	1.1191e-05	--	hypothetical protein
ZMO_RS09025	1346.1	829.041	0.69927	0.0033705	0.0089394	--	MFS transporter
ZMO_RS09040	224.042	538.987	-1.2665	3.1204e-06	1.7433e-05	--	ribosomal RNA small subunit methyltransferase G
ZMO_RS09045	1000.16	2226.21	-1.1544	5.9752e-07	3.8807e-06	--	tRNA uridine 5-carboxymethylaminomethyl modification protein
ZMO_RS09050	1827.41	272.594	2.745	9.1981e-24	6.5023e-22	--	SMP-30/gluconolactonase/LRE family protein
ZMO_RS09055	2333.63	605.084	1.9474	1.137e-08	1.0555e-07	--	aldo/keto reductase
ZMO_RS09070	1464.89	695.747	1.0742	4.1977e-06	2.2736e-05	--	methylated-DNA--[protein]-cysteine S-methyltransferase
ZMO_RS09075	1861.42	431.985	2.1074	1.699e-18	7.8155e-17	--	dienelactone hydrolase family protein
ZMO_RS09080	3212.55	897.256	1.8401	1.6971e-15	5.1136e-14	--	quinone oxidoreductase
ZMO_RS09085	4107.03	14336.8	-1.8036	7.8161e-16	2.4769e-14	--	transcription termination factor Rho
ZMO_RS09090	925.99	1347.22	-0.54092	0.024224	0.049253	--	CopD family protein
ZMO_RS09110	152.056	66.3785	1.1958	0.0048772	0.012297	--	hypothetical protein
ZMO_RS09120	808528	115902	2.8024	0.0062585	0.015358	rnpB	RNase P RNA component class A
ZMO_RS09130	592.064	187.296	1.6604	2.654e-06	1.5196e-05	--	redox-sensitive transcriptional activator SoxR
ZMO_RS09140	22239.8	3374.97	2.7202	2.9184e-32	3.576e-30	ssrA	transfer-messenger RNA
ZMO_RS09155	1537.03	1033.02	0.57329	0.019663	0.041256	--	hypothetical protein
ZMO_RS09165	561.777	358.01	0.65	0.010722	0.02445	--	IS5/IS1182 family transposase
ZMO_RS09170	404.029	107.86	1.9053	6.2907e-11	8.4397e-10	--	DUF465 domain-containing protein
ZMO_RS09175	226.641	131.958	0.78033	0.010107	0.023307	--	entericidin%2C EcnA/B family
ZMO_RS09185	3045.88	10696	-1.8121	4.8863e-16	1.6038e-14	--	50S ribosomal protein L35
ZMO_RS09190	61.3702	106.655	-0.79734	0.023492	0.048082	--	50S ribosomal protein L34
ZMO_RS09195	38.1595	103.295	-1.4366	0.00030871	0.0010666	--	membrane protein insertion efficiency factor YidD
ZMO_RS09205	1624.21	4035.07	-1.3129	3.6013e-09	3.6979e-08	--	50S ribosomal protein L32
ZMO_RS09210	92.91	200.049	-1.1064	0.00033388	0.0011449	--	hypothetical protein
sRNA00017	1393.37	7109.65	-2.3512	1.8522e-24	1.3617e-22	-//-
sRNA00019	1604.1	260.744	2.6211	0.014923	0.032692	-//-
sRNA00026	1221.34	5208.62	-2.0924	1.139e-18	5.5093e-17	-//-
sRNA00048	205.161	1514.59	-2.8841	2.5313e-29	2.5847e-27	-//-
sRNA00059	38.0635	7.98894	2.2523	0.0023152	0.0064671	-//-
sRNA00061	29.5429	150.907	-2.3528	2.0799e-09	2.2621e-08	-//-
